1 **Title: Circulating immunome fingerprint in eosinophilic esophagitis is associated**  
2 **with clinical response to proton pump inhibitor treatment**

3

4 **Authors:**

5 Lola Ugalde-Triviño<sup>1,2\*</sup>, Francisca Molina-Jiménez<sup>1,2\*</sup>, Juan H-Vázquez<sup>3\*</sup>, Carlos  
6 Relaño-Rupérez<sup>1,2,4</sup>, Laura Arias-González<sup>2,6,7,8</sup>, Sergio Casabona<sup>2,9</sup>, María Teresa  
7 Pérez-Fernández<sup>2,9</sup>, Verónica Martín-Domínguez<sup>2,9</sup>, Jennifer Fernández-Pacheco<sup>2,9</sup>,  
8 Alfredo J Lucendo<sup>2,6,7,8</sup>, David Bernardo<sup>3,5,&#</sup>, Cecilio Santander<sup>2,8,9,&#</sup>, Pedro  
9 Majano<sup>1,2,8,10,&#</sup>

10

11 1. Molecular Biology Unit, Hospital Universitario de la Princesa, Madrid, Spain.

12 2. Instituto de Investigación Sanitaria Hospital Universitario de La Princesa (IIS-  
13 Princesa), Madrid, Spain.

14 3. Mucosal Immunology Lab, Centro de Investigaciones Biomédicas en Red de  
15 Enfermedades Infecciosas (CIBERINFEC), Unidad de Excelencia Instituto de Biología  
16 y Genética Molecular (IBGM), Universidad de Valladolid, 47005 Valladolid, Spain.

17 4. Bioinformatics Unit, Centro Nacional de Investigaciones Cardiovasculares (CNIC),  
18 Madrid, Spain

19 5. Centro de Investigación Biomédica en Red de Enfermedades Infecciosas  
20 (CIBERINFEC), 28029 Madrid, Spain

21 6. Department of Gastroenterology, Hospital General de Tomelloso, Tomelloso, Ciudad  
22 Real, Spain.

23 7. Instituto de Investigación Sanitaria de Castilla-La Mancha (IDISCAM), Spain.

24 8. Centro de Investigación Biomédica en Red de Enfermedades Hepáticas y Digestivas  
25 (CIBERehd), Madrid, Spain.

26 9. Department of Gastroenterology, Hospital Universitario de La Princesa, Madrid,  
27 Spain.

28 10. Department of Cellular Biology, Faculty of Biology, Universidad Complutense de  
29 Madrid, Madrid, Spain.

30

31 \* Co-first author

32 & Senior author

33 #Correspondence to:

34

35 Pedro L Majano, PhD

36 Hospital Universitario de la Princesa

37 Instituto Investigación Sanitaria Princesa (IP)

38 Diego de León 62

39 28006. MADRID. Spain

40 ([pmajano@ucm.es](mailto:pmajano@ucm.es) / [pedro.majano@salud.madrid.org](mailto:pedro.majano@salud.madrid.org))

41

42 Dr. Cecilio Santander, MD, PhD

43 Head of Department of Gastroenterology

44 Hospital Universitario de La Princesa

45 Instituto de Investigación Sanitaria Princesa IIS-IP

46 Madrid. Spain

47 ([cecilio.santander@salud.madrid.org](mailto:cecilio.santander@salud.madrid.org))

48  
49 David Bernardo, PhD  
50 Mucosal Immunology Lab, Universidad de Valladolid  
51 Unidad de Excelencia Instituto de Biología y Genética Molecular (IBGM)  
52 Centro de Investigaciones Biomédicas en Red de Enfermedades Infecciosas  
53 (CIBERINFEC)  
54 (d.bernardo.ordiz@gmail.com / [david.bernardo@uva.es](mailto:david.bernardo@uva.es))  
55  
56

#### 57 **AUTHOR CONTRIBUTIONS**

58 Conceived and designed the study: AJL, DB, CS, PM.  
59 Participated in the clinical management of patients: SC, MTF-P, VM-D, JF-P, CS.  
60 Performed the experiments: LU-T, FM-J, JH-V, LA-G, PM.  
61 Analysed and discussed the data: LU-T, FM-J, JH-V, CR-R, DB, PM.  
62 Wrote the paper: LU-T, DB, JH-V, CS, PM.  
63 All the authors read, provided comments, and approved the final version of the  
64 manuscript.  
65

#### 66 **AUTHOR DISCLOSURE**

67 None to declare  
68

#### 69 **ORCID NUMBERS**

70 Lola Ugalde-Triviño: 0000-0002-0911-8043  
71 Francisca Molina-Jiménez: 0000-0003-4912-1025  
72 Juan H-Vázquez: 0000-0002-4805-2403  
73 Carlos Relaño-Rupérez: 0000-0002-1407-9245  
74 Laura Arias-González: 0000-0003-2132-9350  
75 Sergio Casabona: 0000-0002-6131-8341  
76 María Teresa Pérez-Fernández: 0000-0003-0363-2516  
77 Verónica Martín-Domínguez: 0000-0001-6839-2707  
78 Jennifer Fernández-Pacheco 0000-0002-5384-0658  
79 Alfredo J Lucendo: 0000-0003-1183-1072  
80 David Bernardo: 0000-0002-2843-6696  
81 Cecilio Santander: 0000-0001-5492-2535  
82 Pedro Majano: 0000-0002-5495-1413  
83

84

85

86

87

88

89

90

91 **WHAT IS KNOWN**

- 92
- Eosinophilic esophagitis (EoE) is a Th2 type immune disorder with increased prevalence in the last years.
- 93
- Proton pump inhibitor (PPI) treatment is the preferred first-line therapy for EoE, which leads to clinical and pathological reversion in about half of the cases. Non-responding patients require other therapeutic options.
- 94
- Currently, an endoscopy with esophageal biopsies is required for EoE diagnosis and to monitor response to treatment. Therefore, the discovery of non-invasive biomarkers is of utmost importance for treatment monitoring.
- 95
- To date only peripheral eosinophil and Th2 profiles have been studied in EoE.
- 96
- 97
- 98
- 99
- 100
- 101

102 **WHAT IS NEW HERE**

- 103
- At diagnosis EoE patients have a specific circulating immune signature.
- 104
- PPI-responding and non-responding EoE patients have different immune fingerprints at baseline.
- 105
- Immune characterization of EoE patients at diagnosis and after PPI treatment unveiled differential levels of circulating plasmacytoid dendritic cells (pDCs) depending on their inflammatory state and response to PPI treatment. Those levels are related with the number of pDCs infiltrated in the esophageal tissue.
- 106
- 107
- 108
- 109
- 110

111

112

113

114

115

116

117

118

119

120

121

122

123

124

125

126

127 **ABSTRACT**

128 **Objectives:** The aim of the study was to characterize the circulating immunome of  
129 patients with EoE before and after proton pump inhibitor (PPI) treatment in order to  
130 identify potential non-invasive biomarkers of treatment response.

131 **Methods:** PBMCs from 19 healthy controls and 24 EoE patients were studied using a  
132 39-plex spectral cytometry panel. The plasmacytoid dendritic cell (pDC) population was  
133 differentially characterized by spectral cytometry analysis of immunofluorescence  
134 assays in esophageal biopsies from 7 healthy controls and 13 EoE patients.

135 **Results:** Interestingly, EoE patients at baseline had lower levels of circulating pDC  
136 compared with controls. Before treatment, patients with EoE who responded to PPI  
137 therapy had higher levels of circulating pDC and classical monocytes, compared with  
138 non-responders. Moreover, following PPI therapy pDC levels were increased in all EoE  
139 patients, while normal levels were only restored in PPI-responding patients. Finally,  
140 circulating pDC levels inversely correlated with peak eosinophil count and pDC count in  
141 esophageal biopsies. The number of tissue pDCs significantly increased during active  
142 EoE, being even higher in non-responder patients when compared to responder  
143 patients pre-PPI. pDC levels decreased after PPI intake, being further restored almost  
144 to control levels in responder patients post-PPI.

145 **Conclusions:** We hereby describe a unique immune fingerprint of EoE patients at  
146 diagnosis. Moreover, circulating pDC may be also used as a novel non-invasive  
147 biomarker to predict subsequent response to PPI treatment.

148

149 **KEY WORDS**

150 Spectral cytometry, Biomarker, Eosinophilic esophagitis, Plasmacytoid dendritic cells

151

152 **ABBREVIATIONS**

153

154 EoE: Eosinophilic esophagitis

155 EoEHSS: Eosinophilic Esophagitis Histologic Scoring System

156 EREFS: EoE endoscopic reference score

157 GERD: Gastro-esophageal reflux disease.

158 LN: Lymph node

159 LogFC: Log2 Fold Change

160 NR: Non-responder

161 PBMCs: Peripheral blood mononuclear cells

162 pDC: Plasmacytoid dendritic cells

163 PPI: Proton Pump Inhibitors

164 R: Responder

165 Th2: T helper 2 cells

166 UMAP: Uniform Manifold Approximation and Projection

167

168

169

170

171

172 **FINANCIAL SUPPORT**

173 PM and CS are supported by grants PI17/0008 and ISCIII-Proteored 2019 of Instituto  
174 de Salud Carlos III (ISCIII, Spain) and co-funded by Fondo Europeo de Desarrollo  
175 Regional (FEDER). CS is also funded by Asociación Española de Gastroenterología  
176 (AEG) 2019 grant. DB is funded through the Spanish Ministry of Science [PID2019-  
177 104218RB-I00], Programa Estratégico Instituto de Biología y Genética Molecular  
178 (IBGM Junta de Castilla y León. Ref. CCVC8485) and the European Commission –  
179 NextGenerationEU (Regulation EU 2020/2094), through CSIC's Global Health  
180 Platform. LU-T is recipient of an INVESTIGO contract from Comunidad de Madrid (09-  
181 PIN1-00015.6/2022) partly funded by the European Social Fund, NextGenerationEU,  
182 and Recovery, Transformation and Resilience Plan. CR-R is recipient of an  
183 INVESTIGO contract from Ministry of Labour and Social Economy, the national public  
184 employment service (SEPE) (INVESTIGO Exp. 2022-C23.I01.P03. S0020-0000031)  
185 partly funded by the European Social Fund, NextGenerationEU, and Recovery,  
186 Transformation and Resilience Plan.

187

188 **ACKNOWLEDGMENTS**

189 We acknowledge, Instituto de Salud Carlos III, FEDER organization, Spanish  
190 Gastroenterology Association and Spanish Ministry of Science for the support to this  
191 study. Also, we would like to acknowledge the support from European Social Fund,  
192 NextGenerationEU, and Recovery, Transformation and Resilience Plan. We express  
193 our gratitude to Dr. Manuel Gómez for critical review of the manuscript and English  
194 editing.

195

196

197

198 **Word count: 3856**

199

200

201

202

203

204

205

206

207

208

209

210

211

212

213

214

215

216

217

218

219

220

221

## 222 INTRODUCTION

223

224 Eosinophilic esophagitis (EoE) is a Th2-type immune disorder which is considered an  
225 increasing leading cause of chronic esophageal dysfunction in patients of all ages<sup>1,2</sup>  
226 just after gastro-esophageal reflux disease (GERD).

227 Eosinophils are normally found in the gastrointestinal tract; however, they are absent  
228 from the esophageal tissue in health conditions. In EoE, the eosinophil infiltrate in the  
229 esophageal tissue layers<sup>3,4</sup> leads to tissue remodelling and fibrosis as well as  
230 subsequent dysfunction characterized by esophageal dysmotility, narrowing and  
231 rigidity<sup>5</sup>. As a result, patients experience food impaction, dysphagia and heartburn  
232 among other symptoms, which impair their health-related quality of life. Therefore, an  
233 early EoE diagnosis and effective therapy are essential to prevent impairment of  
234 esophageal function. EoE patients often have concurrent allergic responses to food  
235 and airborne allergens, together with a yet unexplained male predominance<sup>6,7</sup>.

236 First-line therapeutic options for EoE include dietary restrictions, protein pump inhibitor  
237 (PPI) therapy and swallowed topical corticosteroids, which provide variable  
238 effectiveness<sup>8-12</sup>. Recently, the anti-interleukin-4 receptor antagonist dupilumab joined  
239 the therapeutic armamentarium against EoE<sup>13,14</sup>. Among them, PPI represent the  
240 preferred therapy in clinical practice, despite its limited effectiveness<sup>15</sup>; histologic  
241 remission and clinical improvement after PPI are achieved by only 50% and 70% of  
242 treated patients, respectively<sup>16</sup>. Patients who do not respond to PPI require  
243 subsequent therapeutic options.

244 Currently, EoE diagnosis and treatment response monitoring require endoscopy with  
245 esophageal biopsies, as clinical symptoms do not correlate well with esophageal  
246 inflammation<sup>17,18</sup>. In this regard, the chronic nature of this disease together with the  
247 dissociation between patients' symptoms and esophageal inflammation<sup>18</sup> require  
248 seeking for novel reliable biomarkers and clinical parameters able to identify patient  
249 profiles at diagnosis and follow-up. Recent studies have focused on seeking for new  
250 biomarkers by characterizing the RNA<sup>19-21</sup> and proteomic profile of EoE at esophageal  
251 tissue level<sup>22</sup>. Nevertheless, these approaches are still invasive. Hence, the  
252 development of novel non-invasive biomarkers to aid on EoE diagnosis and monitoring  
253 is an essential unmet need<sup>23</sup>.

254 Building from all these precedents, in this study we aimed to characterize the  
255 circulating immunome of EoE patients at the time of diagnosis using top-of-the-art  
256 spectral cytometry. With this approach, we expected to identify specific immune  
257 subsets that could not only help to characterize this disorder, but also to identify novel  
258 non-invasive biomarkers able to predict response to PPI treatment.

259

260

## 261 MATERIAL AND METHODS

262

### 263 Human subjects

264

265 A total of 25 incident adult EoE patients were prospectively recruited at the moment of  
266 diagnosis at Hospital Universitario de La Princesa (Madrid, Spain) between February  
267 2018 and November 2020. EoE was diagnosed according to evidence-based

268 guidelines<sup>3</sup> including: (i) symptoms referring to esophageal dysfunction, (ii) infiltration of  
269 the esophageal epithelium by 15 or more eosinophils per high-powered field (hpf)  
270 assessed from 6 endoscopic biopsy samples; (ii) absence of eosinophilic infiltration in  
271 biopsy specimens from gastric and duodenal mucosa; and (iii) exclusion of alternative  
272 potential causes of esophageal eosinophilia. Subjects (n=19) who underwent upper  
273 endoscopy for assessment of dyspepsia or suspected gastroduodenal ulcer were  
274 included as controls. Esophageal biopsies obtained in the endoscopy were normal in  
275 all cases and eosinophilic infiltration was excluded. All controls with hiatus hernia,  
276 incompetent cardias, or esophageal peptic lesions were excluded hence ensuring that  
277 all the recruited controls displayed a normal endoscopic appearance and eosinophil-  
278 free biopsies of the esophagus.

279 Atopic background was recorded for all EoE patients and control subjects. The EoE  
280 endoscopic reference score (EREFS) rating the severity of esophageal inflammation  
281 (oedema, furrows, exudates) and fibrosis (rings and stricture)<sup>24</sup> was assessed in all  
282 patients. Furthermore, the validated Eosinophilic Esophagitis Histologic Scoring  
283 System (EoEHSS) was also determined, evaluating eight pathologic features for both  
284 severity (grade) and extent (stage) of abnormalities<sup>25</sup>.

285 Out of the 25 EoE patients, 18 underwent double dose PPI treatment (omeprazole 20  
286 mg b.i.d. or equivalent) for an 8-week period, after which they were classified as  
287 responders (n=9) or non-responders (n=9) based on the peak eosinophil count in a  
288 second endoscopy in which EREF and EoEHSS scores were also assessed. The study  
289 was approved by the local Ethics Committee (PI17/0008, registry number 3107, 8 June  
290 2017). All individuals provided written informed consent.

291

## 292 **Blood samples**

293 In all cases, blood samples were obtained at the time of the endoscopy from EoE  
294 patients (both before and after PPI-treatment in the latter) and controls. After placing a  
295 venous line to provide sedation for endoscopy, blood was collected in EDTA-coated  
296 tubes to isolate peripheral blood mononuclear cells (PBMC).

297

## 298 **PBMCs staining and spectral cytometry acquisition**

299 PBMCs were isolated by Ficoll gradient assay. Viable cells were counted and  
300 cryopreserved in freezing medium (Foetal bovine serum [Hyclone,Thermofisher]  
301 complemented with DMSO 20% medium) at vapour phase of liquid nitrogen.

302 For the analysis, PBMCs were thawed and a total of 2 million PBMCs were stained with  
303 monoclonal antibodies (Supplementary Table 1) applying a modified OMIP-69 panel  
304 protocol<sup>26</sup>. Before staining, Live/Dead fixable blue dead cell stain kit was added to  
305 exclude dead cells from the analysis. Brilliant Stain Buffer and True-Stain Monocyte  
306 Blocker were also added before staining with the aim of obtaining the optimal  
307 fluorescence. PBMCs were washed with FACS buffer (500mL PBS +1 0mL filtered  
308 FCS + 0.1g NaN<sub>3</sub> + 2.5mL sterile EDTA) and incubated in the dark at room  
309 temperature during staining. Cells were further fixed in 0.8% paraformaldehyde in  
310 FACS buffer in the dark for 10min and washed with FACs buffer. Cells were preserved  
311 at 4°C until acquired (within 48h) in a 5-laser spectral cytometer (Aurora, Cytek).

312

## 313 **Cytometry data and statistical analysis**

314 Spectral cytometry data were analysed using the OMIQ Data Science platform (©  
315 Omiq, Inc. 2022). After setting the scale, parameters, and cofactors, the FlowAI

316 algorithm was used for cleaning the data from aberrant signal patterns or events. Then,  
317 cell debris and doublets were excluded to gate viable leukocytes (CD45<sup>+</sup>) where an  
318 unsupervised approach was applied with a dimensionality reduction Uniform Manifold  
319 Approximation and Projection (UMAP)<sup>27</sup> plus clustering FlowSOM algorithms. Merging  
320 these two algorithms allows a deeper classification of the different immune subsets  
321 through different marker expression on the UMAP. A heatmap was also built showing  
322 the expression levels of each marker within each cluster. Dendrograms further grouped  
323 the clusters and markers associated by similarity.  
324 Statistical analysis was performed in all cases using Rstudio 2022.07.2+576.  
325 Differential analysis of clusters defined in OMIQ was performed with the edgeR  
326 package, using genewise quasi-likelihood (QL) F-tests with GLMs. Significance was set  
327 at p-value ≤ 0.05 and Log2 Fold Change (LogFC) ≥ 1.5. Differences between groups of  
328 significant clusters were validated by classic gating strategy approaches  
329 (Supplementary Figure 1 and 2). Manual gating results were analysed by *t*-test (paired  
330 when indicated) and/or two-way ANOVA test followed by *post hoc* Fisher test. Outliers  
331 were determined through Grubbs' test and deleted from the final analysis. Statistical  
332 significance was considered when p-value ≤ 0.05 in all cases (p < 0.05 \*, p < 0.01 \*\*,  
333 p < 0.001 \*\*\*, p < 0.0001 \*\*\*\*, n.s. = not significant). Percent of total always refers to  
334 percentage of cells of the specified population relative to total PBMCs.

335

### 336 **Immunofluorescence staining in esophageal biopsies**

337

338 Immunofluorescence staining was performed in biopsies from control subjects and EoE  
339 patients, previously oriented in a cellulose acetate and included in paraffin-embedded  
340 blocks, using the antibodies CD123-biotin (Stem Cell, 60110BT), HLA-DR (Santa Cruz,  
341 sc-53319) and CD11c (Thermo Fisher Scientific, PA535326). Briefly, slides with 4-µm  
342 sections of esophageal biopsies, underwent deparaffinization, antigen retrieval using  
343 sodium citrate buffer (pH 6.0), blocked with 4% goat serum/phosphate-buffered saline  
344 (PBS), and then incubated with primary antibody (HLA-DR and CD11c) diluted in 1%  
345 goat serum-PBS overnight at 4 °C in a humidified chamber. Then, slides were washed  
346 with PBS + 1% NP-40 and incubated with secondary antibodies diluted in 1% goat  
347 serum-PBS for 30min at RT in a humidified chamber. After, slides were washed with  
348 PBS + 1% NP-40 and incubated with primary antibody (CD123) diluted in 1% goat  
349 serum/PBS overnight at 4 °C in a humidified chamber. Finally, slides were washed in  
350 PBS + 1% NP-40 and incubated with secondary antibodies and DAPI (0.5 µg/mL)  
351 diluted in 1% goat serum/PBS for 30min at RT in a humidified chamber. Finally, a cover  
352 slip was added with ProLong Gold mounting reagent (Molecular Probes). Images were  
353 obtained using a Thunder Imager (Leica) with LAS X software and analysis was done  
354 using ImageJ and RStudio software. Normality was assessed by Saphiro Wilk  
355 normality test, the non-parametric Mann-Whitney test was done to compare between  
356 pairs of groups. In all cases (p < 0.05 \*, p < 0.01 \*\*, p < 0.001 \*\*\*, p < 0.0001 \*\*\*\*, n.s. = not  
357 significant).

358



359 **RESULTS**

360

361 **Patient Demographics**

362 Clinical and demographic characteristics of study participants are summarized in Table  
363 1. Compared to controls (n=19), EoE patients (n=25) were older (34 vs 41 years) and  
364 more frequently male (68% vs 88%), but no significant differences were found in  
365 demographic characteristics across groups.

366 EoE patients treated with PPI (n=18) were classified as responders or non-responders  
367 to the therapy. EoE remission was defined as presenting a peak eosinophil count  
368 below 15 after at least 8 weeks of treatment. Response to PPI was also associated  
369 with improvement in EoE symptoms from baseline (assessed as patient reported  
370 outcomes), as well as in endoscopic and histologic characteristics, assessed with the  
371 scores EREFS and Grade and Stage EoEHSS, respectively. Baseline characteristics of  
372 PPI responding, and non-responding patients showed no differences.

|                                                   | Control<br>(n=19) | EoE<br>(n=25) | p-value | Responders<br>(n=9) | Non-Responders<br>(n=9) | p-value |
|---------------------------------------------------|-------------------|---------------|---------|---------------------|-------------------------|---------|
| Sex (male) (n,%)                                  | 13 (68%)          | 20 (80%)      | 0.488   | 7 (77%)             | 7 (77%)                 | 1       |
| Age (mean years ± s.d.)                           | 34.42 ± 10.93     | 41 ± 13.7     | 0.060   | 33 ± 12.85          | 44 ± 14.95              | 0.152   |
| <i>Symptoms (n,%)</i>                             |                   |               |         |                     |                         |         |
| Dysphagia                                         | 0                 | 23 (92%)      | <0.001  | 9 (100%)            | 9 (100%)                | 1       |
| Food impaction                                    | 0                 | 16 (64%)      | <0.001  | 7 (77%)             | 5 (55%)                 | 0.819   |
| Heartburn                                         | 0                 | 10 (40%)      | 0.002   | 3 (33%)             | 3 (33%)                 | 1       |
| Abdominal pain                                    | 0                 | 0 (0%)        | 1       | 0 (0%)              | 0 (0%)                  | 1       |
| <i>Any atopic disease (n,%)</i>                   |                   |               |         |                     |                         |         |
| Atopic diseases                                   | 1 (5%)            | 20 (87%)      | <0.001  | 8 (88%)             | 9 (100%)                | 1       |
| Asthma                                            | 0                 | 5 (22%)       | 0.053   | 3 (33%)             | 1 (11%)                 | 0.573   |
| Allergic rhinitis/sinusitis                       | 1 (5%)            | 19 (82%)      | <0.001  | 8 (88%)             | 9 (100%)                | 1       |
| Food allergy                                      | 2 (10%)           | 11 (48%)      | 0.0173  | 5 (55%)             | 3 (33%)                 | 0.637   |
| <i>Endoscopic findings (n,%)</i>                  |                   |               |         |                     |                         |         |
| EREFs (mean ± s.d.)                               | 0                 | 3.36 ± 2      | <0.001  | 2.44 ± 2.06         | 3.88 ± 1.26             | 0.097   |
| EREFs PostPPI (mean ± s.d.)                       | -                 | -             | -       | 1.44 ± 1.51         | 4.33 ± 1                | <0.001  |
| Maximum eosinophil count<br>(mean ± s.d.)         | 0                 | 55.66 ± 23.9  | <0.001  | 46.22 ± 21.76       | 65.56 ± 19.43           | 0.064   |
| Maximum eosinophil count PostPPI<br>(mean ± s.d.) | -                 | -             | -       | 1.44 ± 2            | 65 ± 20.91              | <0.001  |
| <i>Histological findings</i>                      |                   |               |         |                     |                         |         |
| EoEHSS Grade (0-1)<br>(mean ± s.d.)               | 0                 | 0.50 ± 0.19   | <0.001  | 0.43 ± 0.22         | 0.57 ± 0.15             | 0.122   |
| EoEHSS Grade (0-1) PostPPI<br>(mean ± s.d.)       | -                 | -             | -       | 0.06 ± 0.04         | 0.40 ± 0.22             | 0.006   |
| EoEHSS Stage (0-1)<br>(mean ± s.d.)               | 0                 | 0.47 ± 0.16   | <0.001  | 0.43 ± 0.17         | 0.57 ± 0.15             | 0.122   |
| EoEHSS Stage (0-1) PostPPI<br>(mean ± s.d.)       | -                 | -             | -       | 0.02 ± 0.03         | 0.31 ± 0.19             | 0.007   |
| <i>PPI Treatment</i>                              |                   |               |         |                     |                         |         |
| Omeoprazol                                        | -                 | -             | -       | 6 (66%)             | 2 (22%)                 | 0.1385  |
| Esomeprazol                                       | -                 | -             | -       | 2 (22%)             | 2 (22%)                 |         |
| Pantoprazol                                       | -                 | -             | -       | 1 (11%)             | 5 (55%)                 |         |

373

374 **Table 1. Clinical features of controls and EoE patients.** Fisher's test and *t*-test were  
375 applied to analyse differences between control and EoE patients and between  
376 responders and non-responders. P-value is shown for each comparison. Abbreviations:  
377 EoE: Eosinophilic Esophagitis; EoEHSS: Eosinophilic Esophagitis Histologic Scoring  
378 System; EREFS: EoE endoscopic reference score; PPI: Proton Pump Inhibitors.

379 **High dimensional analysis on PBMCs from controls and EoE patients**

380 A total of 61 samples (19 controls, 24 patients at disease onset, as well as 9  
381 responders and 9 non-responders to PPI after 8-week treatment) were analysed by  
382 UMAP identifying four major continents and several smaller islands (Figure 1A). The  
383 relative expression of each marker on the UMAP (Supplementary Figure 3) revealed  
384 that the main continent on the left represents cytotoxic (CD8<sup>+</sup>) T-cells together with  
385 double negative (CD4<sup>-</sup>CD8<sup>-</sup>) T-cells. On the other hand, the main continent on the right  
386 is composed of helper (CD4<sup>+</sup>) T-cells. Likewise, the island on the bottom is mainly  
387 composed of monocytes, basophils and myeloid antigen presenting cells (APC), while  
388 the islands in the middle represent NK cells and  $\gamma\delta$  T-cells. B-cells are represented in  
389 the top island together with dendritic cells.

390

391 To further refine the analysis, FlowSOM algorithm was applied to find similar cell  
392 subsets and separate them into metaclusters in an unsupervised manner (Figure 1B).  
393 The overlay of the FlowsSOM clustering on the UMAP representation (Figure 1C)  
394 allowed us to perform a more exhaustive analysis, identifying a total of 73 clusters  
395 according to surface marker expression as shown in the heatmap (Figure 1D).  
396 Supplementary Table 2 shows an in-depth characterization of the phenotype of all  
397 clusters, which allowed the identification of 70 of them, since clusters 13, 32 and 33  
398 could not be clearly identified. Finally, all clusters were further uploaded into the UMAP  
399 (Figure 1E) to determine not only how they relate to each other, but also to display their  
400 pseudoevolution.

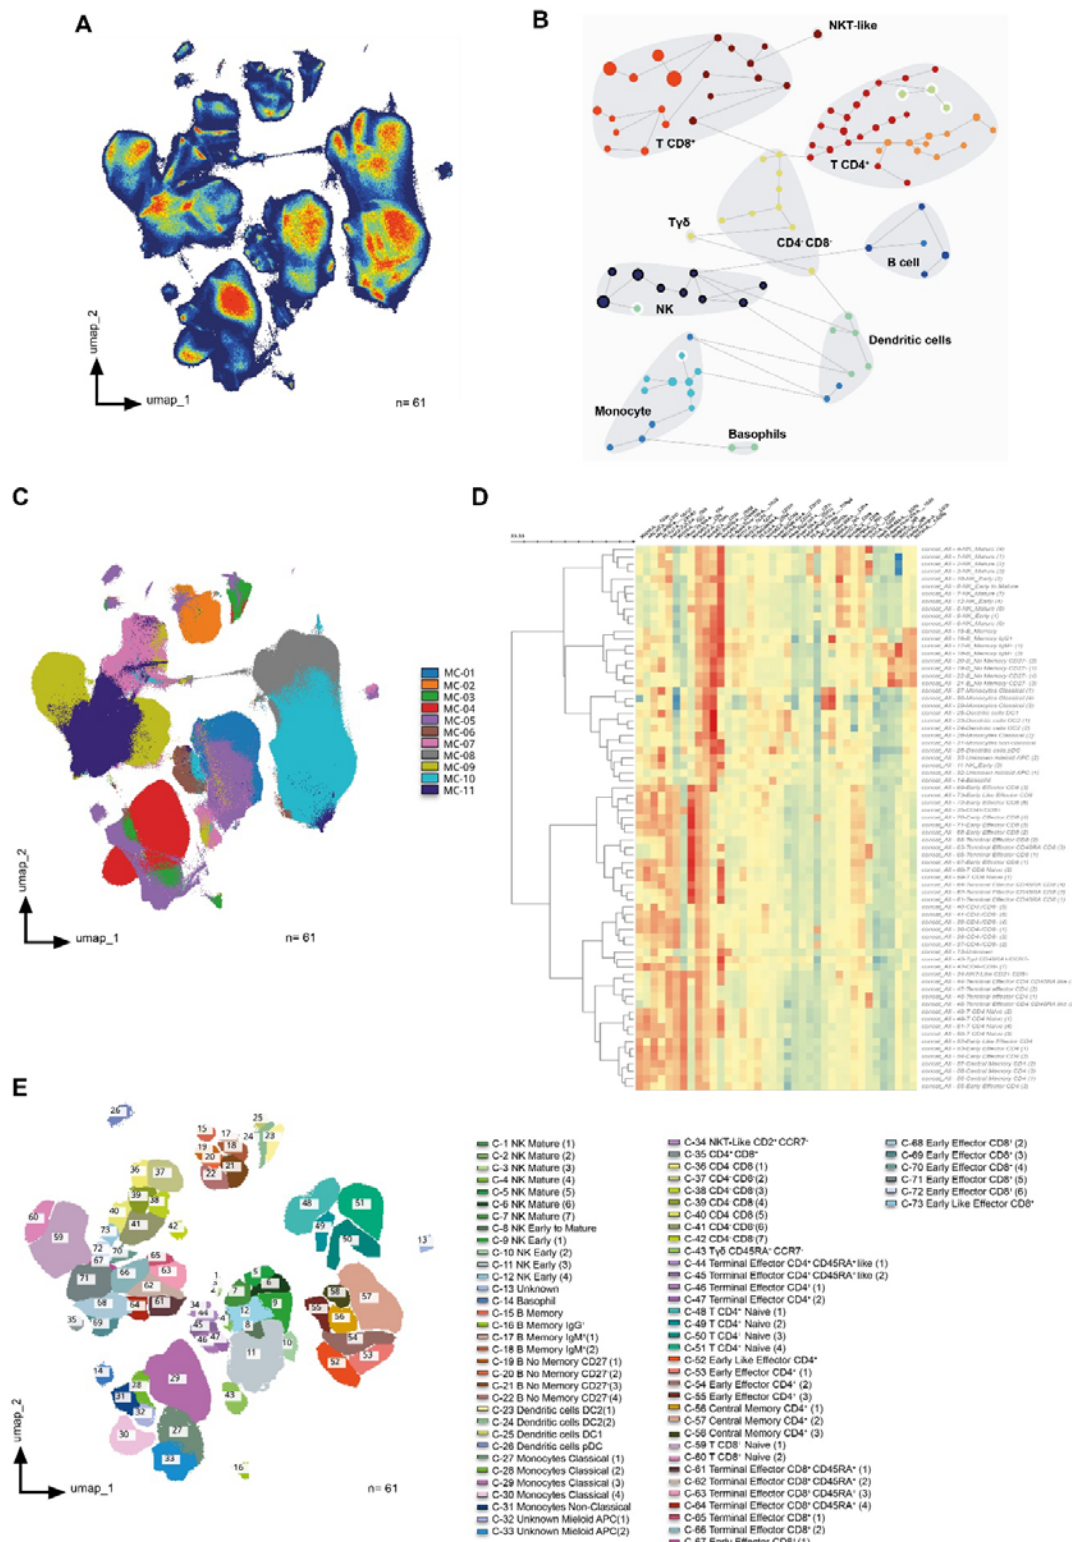

401  
402  
403  
404  
405  
406

**Figure 1. High dimensional analysis of peripheral blood mononuclear cells from controls and EoE patients.**

**(A)** UMAP density analysis representation performed on singlets corresponding to total viable circulating CD45<sup>+</sup> cells from all samples. Samples were obtained from 19 controls and 24 patients at disease onset, as well as 9 responders and 9 non-

407 responders to PPI therapy after 8-week treatment (a total of 61 samples). **(B)**  
 408 FlowSOM clustering on total viable singlet CD45<sup>+</sup> cells identified the main metaclusters  
 409 on dataset: B-cells, NK cells,  $\gamma\delta$  T-cells, CD4<sup>+</sup> T-cells, CD8<sup>+</sup> T-cells, dendritic cells,  
 410 basophils, monocytes, CD4<sup>-</sup>CD8<sup>-</sup> T-cells, and NKT-like cells. **(C)** UMAP representation  
 411 of all samples after non-supervised FlowSOM clusterization **(D)** Heatmap displaying  
 412 the relative expression of each marker within each of the 73 identified clusters.  
 413 Euclidean distance between clusters was calculated and represented by the  
 414 dendrogram at the left side of the plot. **(E)** All 73 identified clusters were overlaid on the  
 415 UMAP projection. Each identified cluster is tagged by a specific colour and number as  
 416 shown in the legend.

417

418

### 419 Peripheral immune profile differs between EoE patients and controls at baseline 420 visit

421 After characterizing the different clusters, or immune subsets, present in our samples,  
 422 we next addressed the immune differences found between controls and EoE patients  
 423 at baseline visit. Volcano plot representation (Figure 2A) showed a significant deficit of  
 424 plasmacytoid dendritic cells (pDC) (C-26) in EoE patients and an expansion of CD4<sup>-</sup>  
 425 CD8<sup>-</sup> and early effector CD8<sup>+</sup> T-cells (Clusters 37 and 69) at the time of disease  
 426 diagnosis (Figure 2B). In order to further confirm these findings, classical gating  
 427 strategies were applied as shown in Supplementary Figure 2, hence confirming that  
 428 EoE patients display a deficit of circulating pDC at disease onset (Figure 2C).

429

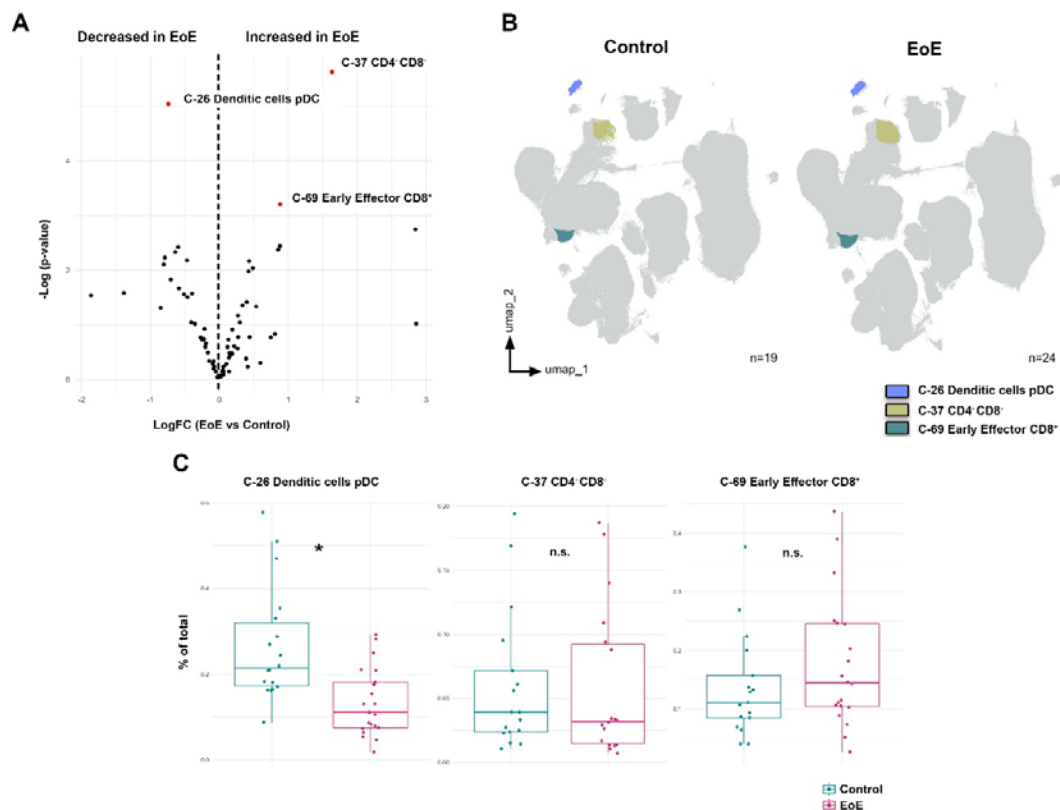

430

431 **Figure 2. Peripheral immune profile differs between EoE patients and controls at**  
 432 **baseline visit.**

433 **(A)** Volcano plot analysis comparing clusters from controls (n=19) and patients with  
434 eosinophilic esophagitis at disease diagnosis (EoE, n=24). LogFC and -Log(p-value)  
435 are shown. Clusters considered statistically significant are shown in red together with  
436 their nature as elucidated from Supplementary Table 2. **(B)** These differentially  
437 expressed clusters between control and EoE patients are further shown in the UMAP  
438 representation. **(C)** Validation of these clusters was performed following classical  
439 gating approaches (Supplementary Figure 1 and 2). *t*-test was applied in panel D,  
440 considering a p-value <0.05 as statistically significant (\*p<0.05). Percent of total always  
441 refers to percentage of cells of the specified population relative to total PBMCs.

442

443 **Circulating pDC and classical monocyte levels at baseline are associated to PPI**  
444 **response.**

445

446 After describing that 3 clusters were differentially expressed on EoE patients at disease  
447 diagnosis, with a specific reduction of circulating pDCs as confirmed by classical gating  
448 approaches, we next aimed to address whether we could also identify specific clusters  
449 that might predict patient's response to PPI treatment.

450 To that end, we compared the immune profile of responding (R) and non-responding  
451 (NR) patients (Table1) at disease onset (i.e., before PPI treatment [PrePPI]) (Figure  
452 3A). Our results revealed that responding patients at diagnosis had higher levels of  
453 circulating pDC, myeloid antigen presenting cells and classical monocytes; together  
454 with lower levels of mature NK cells, and no memory B-cells and central memory CD4<sup>+</sup>  
455 T-cells (Figures 3B and 3C). Of note, further analysis following classical gating  
456 approaches confirmed that PPI-responding patients had higher levels of circulating  
457 pDC and classical monocytes at disease onset compared to non-responders (Figure  
458 3D).

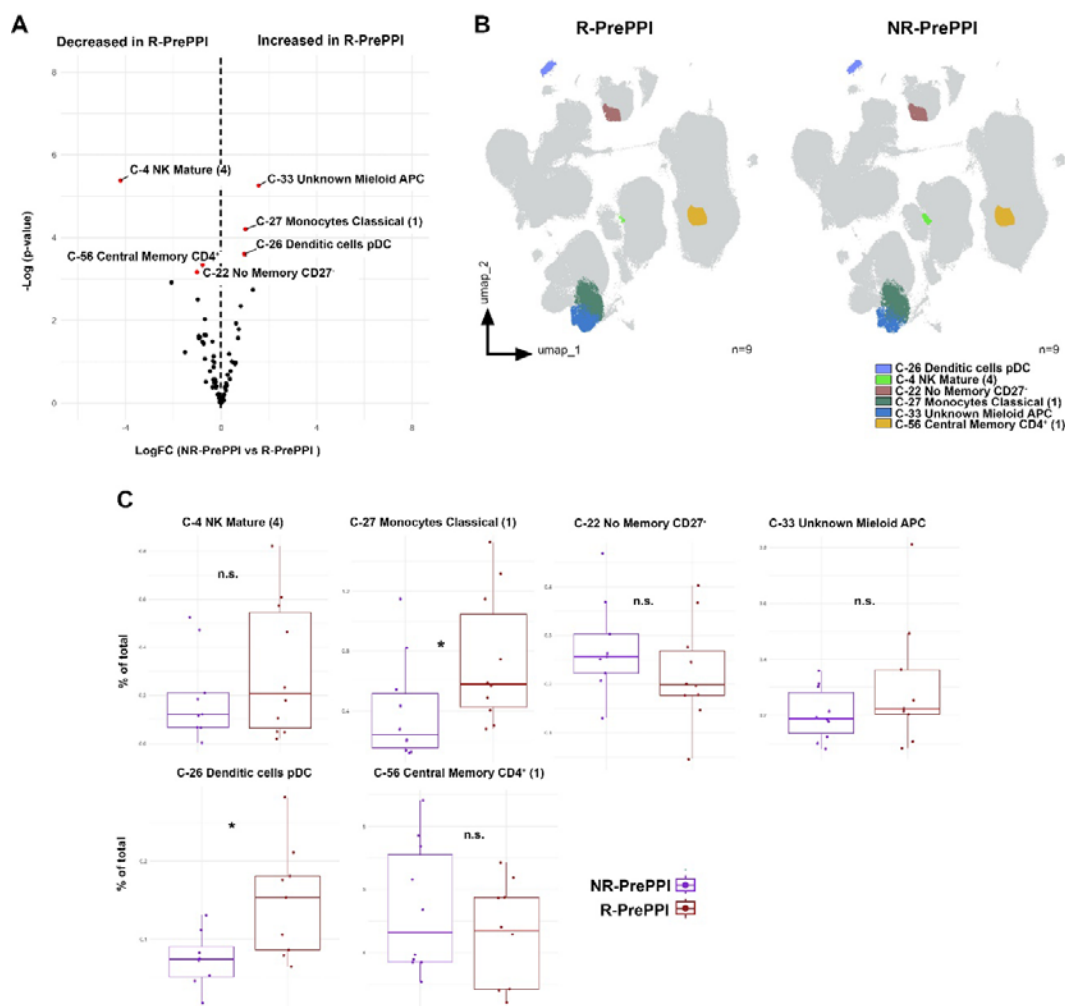

459

460

### Figure 3. Circulating pDC and classical monocyte levels are associated to PPI response at disease diagnosis

461

(A) Volcano plot of differential analysis between responding (R, n=9) and non-responding patients (NR, n=9). LogFC and -Log(p-value) at baseline are shown.

462

Clusters considered statistically significant are highlighted in red, showing their name and number. (B) UMAP representation from R and NR patients, in which significant clusters are coloured.

463

(C) Validation by classic gating (Supplementary Figure 1 and 2) of the significant clusters previously defined. Boxplots of significant clusters represent individual percentage of total value, group medians as well as minimum and maximum values.

464

Differences were analysed by *t*-test considering p-values <0.05 as statistically significant (\**p*<0.05, \*\**p*<0.01, \*\*\**p*<0.001, \*\*\*\**p*<0.0001) (R n=8, NR n=7). Responder (R), Non-Responder (NR), before treatment (PrePPI). Percent of total always refers to percentage of cells of the specified population relative to total PBMCs.

465

466

467

468

469

470

471

472

473

### Circulating pDC levels are restored in PPI-responding patients following treatment

474

475

476

Since patients with PPI responsive and non-responsive EoE displayed different immune cell levels at the time of disease diagnosis, we next aimed to address whether we could also identify specific clusters modulated by PPI treatment. To that end, we

477

478

479

480 next compared the profile of EoE responsive (R) patients both before (PrePPI) and  
481 after (PostPPI) PPI therapy (Table1).  
482 Our results revealed that, following treatment, circulating levels of pDC (C-26) and  
483 basophils (C-14) were increased in PPI-responding patients (Figures 4A and 4B),  
484 something particularly relevant in the case of circulating pDC as that increase was  
485 further confirmed by classical gating approaches (Figure 4C).  
486 Based on these observations, we also assessed the immune cell dynamics in non-  
487 responding patients (Supplementary Figure 4A). The pDC cluster was increased in  
488 these patients following treatment (Supplementary Figure 4B); however, that  
489 observation could not be confirmed following classical gating strategy (Supplementary  
490 Figure 4C). Therefore, taken all together our results suggest that clinical response to  
491 PPI-treatment is associated with an increase in circulating pDC levels.  
492

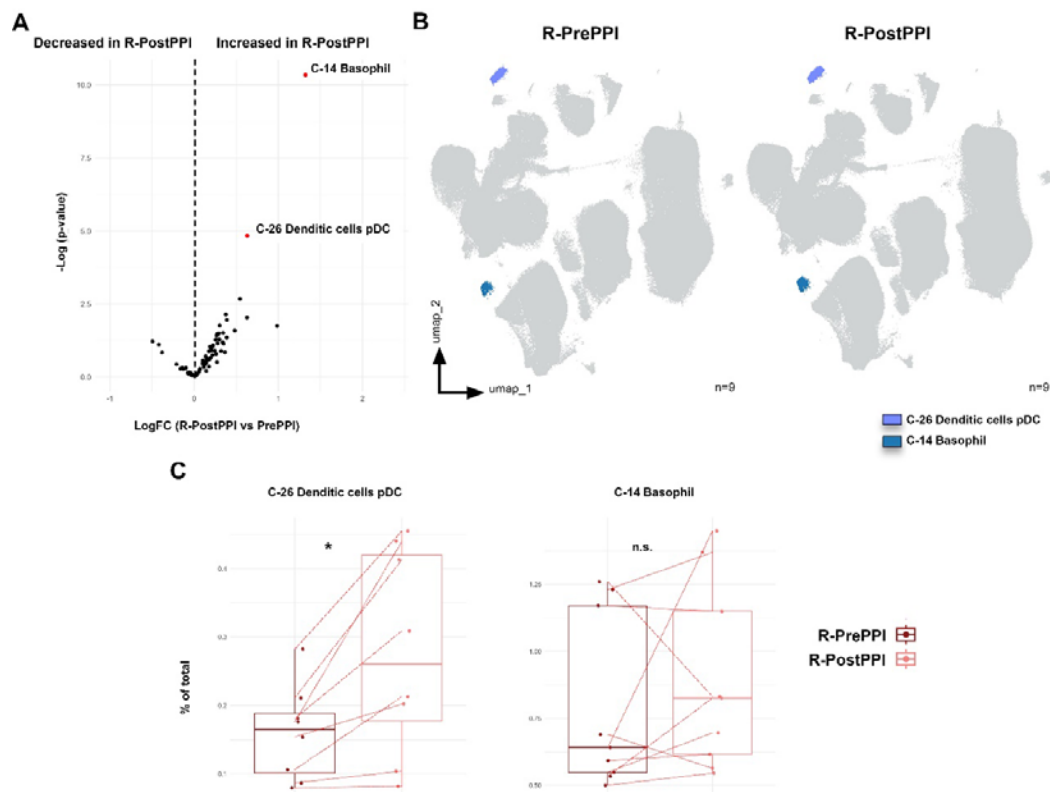

493

494

495 **Figure 4. pDC and basophil levels are increased in responding patients upon PPI**  
496 **treatment.**

497 **(A)** Volcano plot analysis of the clusters comparing patients responding to proton pump  
498 inhibitor (PPI) treatment, both before (R-PrePPI) and after (R-PostPPI) therapy. LogFC  
499 and -Log(p-value) are shown. Clusters considered statistically significant are shown in  
500 red together with their nature as elucidated from Supplementary Table 2. **(B)** UMAP  
501 representation of these differentially expressed clusters in R-PrePPI and R-PostPPI.  
502 **(C)** Further validation of these clusters was performed following classical gating  
503 approaches as shown in Supplementary Figure 1 and 2. Boxplots of significant clusters  
504 represent individual percentage of total value, group medians as well as minimum and  
505 maximum values. Red line indicates paired PrePPI and PostPPI samples. Differences

506 were analysed by paired *t*-test considering p-values <0.05 as statistically significant  
507 (\*p<0.05, \*\*p< 0.01, \*\*\*p< 0.001, \*\*\*\*p<0.0001) (n=8). Responder (R), before PPI  
508 treatment (PrePPI), after PPI treatment (PostPPI). Percent of total always refers to  
509 percentage of cells of the specified population relative to total PBMCs.

510

### 511 **Circulating pDCs are associated with EoE pathology and PPI-response**

512 Having described that pDCs are differentially decreased in EoE patients at the moment  
513 of diagnosis, (Figure 2) while within EoE patients they are higher in those who respond  
514 to PPI treatment (Figure 3) and, indeed, they are further increased following such  
515 clinical intervention (Figure 4) although not in non-responding patients (Supplementary  
516 Figure 4), we next decided to focus on this cell population. Hence, further analysis  
517 confirmed that all EoE patients had lower levels of circulating pDCs at diagnosis,  
518 although these levels were lower in non-responding patients than in responders.  
519 Furthermore, in responders pDC levels were indeed further restored to control levels  
520 following treatment.

521 Since pDCs seem to be related to disease remission, we next hypothesized that cells  
522 might be correlated with the esophageal inflammatory state of the patient. To test this  
523 hypothesis, we studied the correlation between the maximum eosinophil count in the  
524 esophageal biopsy and pDC levels (Figure 5B). We found a negative correlation ( $r =$   
525  $0.44$  p-value= <0.001), suggesting the implication of pDCs in EoE pathogenesis.

526

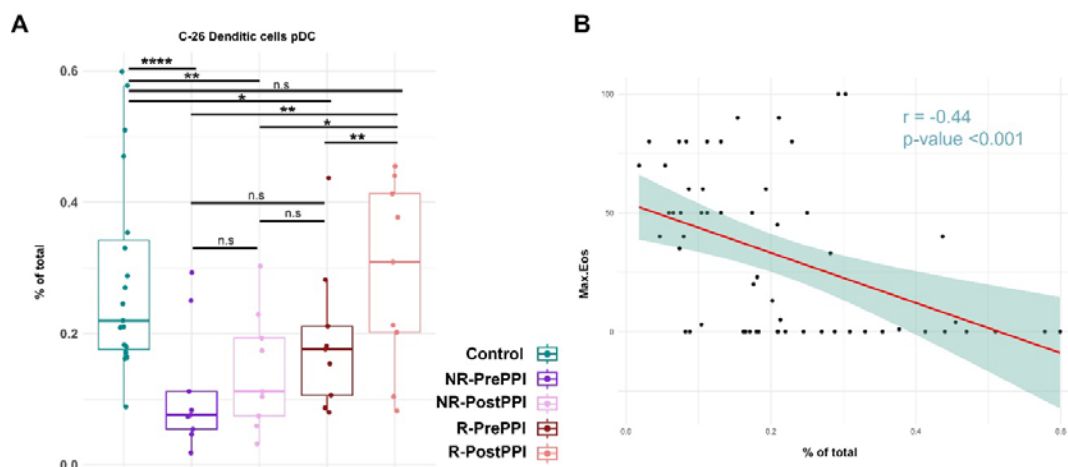

527

### 528 **Figure 5. Circulating pDC are associated with EoE pathology and PPI-response**

529 **(A)** Boxplots represent levels of pDC in control and EoE patients before and after PPI  
530 treatment, as individual percentages of total counts as well as group medians and  
531 minimum and maximum values. Differences were analysed by *t*-test, considering p-  
532 values <0.05 as statistically significant. **(B)** Pearson correlation between pDC and peak  
533 eosinophil count. Pearson correlation coefficient and p-value are shown. (Control n=19,  
534 R n=9, NR n=9). Responder (R), Non-Responder (NR), before PPI treatment (PrePPI),  
535 after PPI treatment (PostPPI) (\*p<0.05, \*\*p< 0.01, \*\*\*p< 0.001, \*\*\*\*p<0.0001).

536

537

538

539

540

541



542  
543  
544  
545  
546  
547  
548  
549  
550  
551

### Differential activation profile of circulating pDCs in EoE and remission

Next, we assessed the expression of the chemokine receptors CCR7 and CXCR3 on circulating pDC, as they mediate pDC migration towards the lymph nodes (LN) and peripheral sites of inflammation<sup>28,29</sup> (Figure 6A). CXCR3<sup>+</sup> pDC (either CCR7<sup>+</sup> or CCR7<sup>-</sup>) were increased in PPI responding patients following treatment (Figure 6B) suggesting a potential mechanism of action for pDC related with their infiltration in the esophagus.

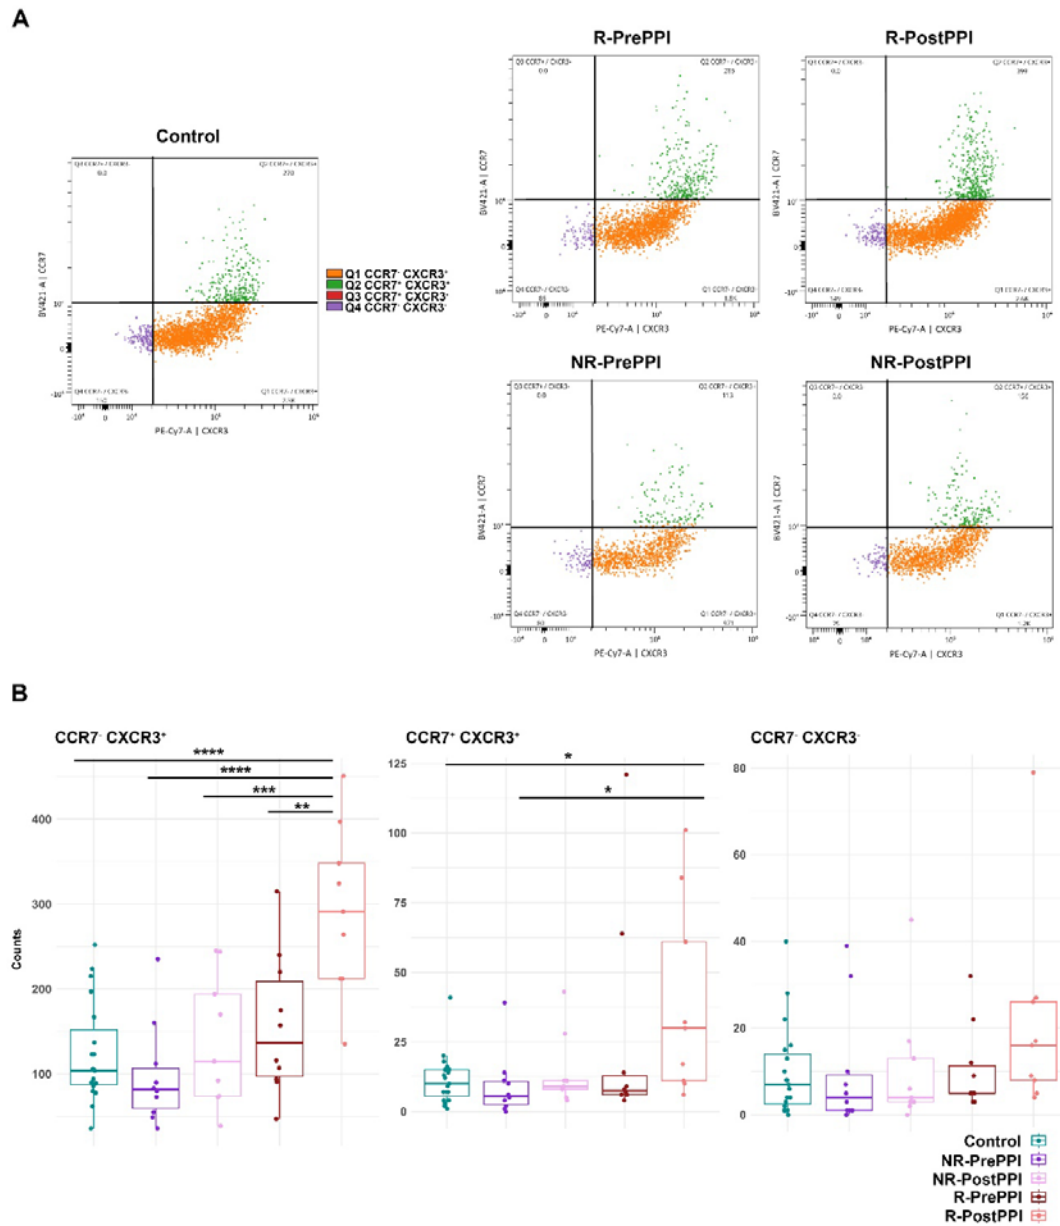

552  
553  
554  
555

**Figure 6. Differential activation profile of circulating pDC in EoE and remission. (A) Gating of activated pDC subpopulations according to their CCR7 and CXCR3**

556 expression: CCR7<sup>-</sup>/CXCR3<sup>+</sup>(blue), CCR7<sup>+</sup>/CXCR3<sup>+</sup> (orange), CCR7<sup>+</sup>/CXCR3<sup>-</sup> (green),  
557 CCR7<sup>-</sup>/CXCR3<sup>-</sup> (red). Dot plots show representative distribution of these  
558 subpopulations in each cohort. **(B)** Boxplot representation of the different pDC  
559 activation profiles in the five cohorts . Total count, group median and minimum and  
560 maximum values are represented. Differences were analysed by multiple comparison  
561 ANOVA followed by *post hoc* Fisher's test, considering p-values <0.05 as statistically  
562 significant (\*p<0.05, \*\*p< 0.01, \*\*\*p< 0.001, \*\*\*\*p<0.0001). (Control n=19, R n=9, NR  
563 n=9). Responder (R), Non-Responder (NR), before treatment (PrePPI), after treatment  
564 (PostPPI).  
565

### 566 **pDC infiltration in esophageal biopsies of EoE patients**

567  
568 Finally, after describing the activation profile of the circulating pDC population, we  
569 studied by immunofluorescence assay the infiltration of these cells in esophageal  
570 biopsies of 7 healthy controls and 13 EoE patients (6 R and 7 NR) before and after PPI  
571 treatment (Figure 7). pDCs were characterized as CD123<sup>+</sup> (red) HLA-DR<sup>+</sup> (green)  
572 CD11c<sup>-</sup> (blue) cells and quantified per mm<sup>2</sup> of tissue (Figure 7A). The number of tissue  
573 pDCs was significantly higher in EoE patients than in controls (Figure 7B), being higher  
574 in NR-prePPI when compared to R-prePPI (Figure 7C). The number of tissue pDCs  
575 was reduced in NR and R patients after PPI treatment although differences were not  
576 statistically significant. However, R-postPPI values were the closest to those of  
577 controls (Figure 7C).

578 In general, tissue pDCs inversely correlated with the circulating pDC count and were  
579 directly related with the number of eosinophils per mm<sup>2</sup> (Figure 7D,E). Thus, levels of  
580 this immune population seem to be related with PPI-response and EoE activity.

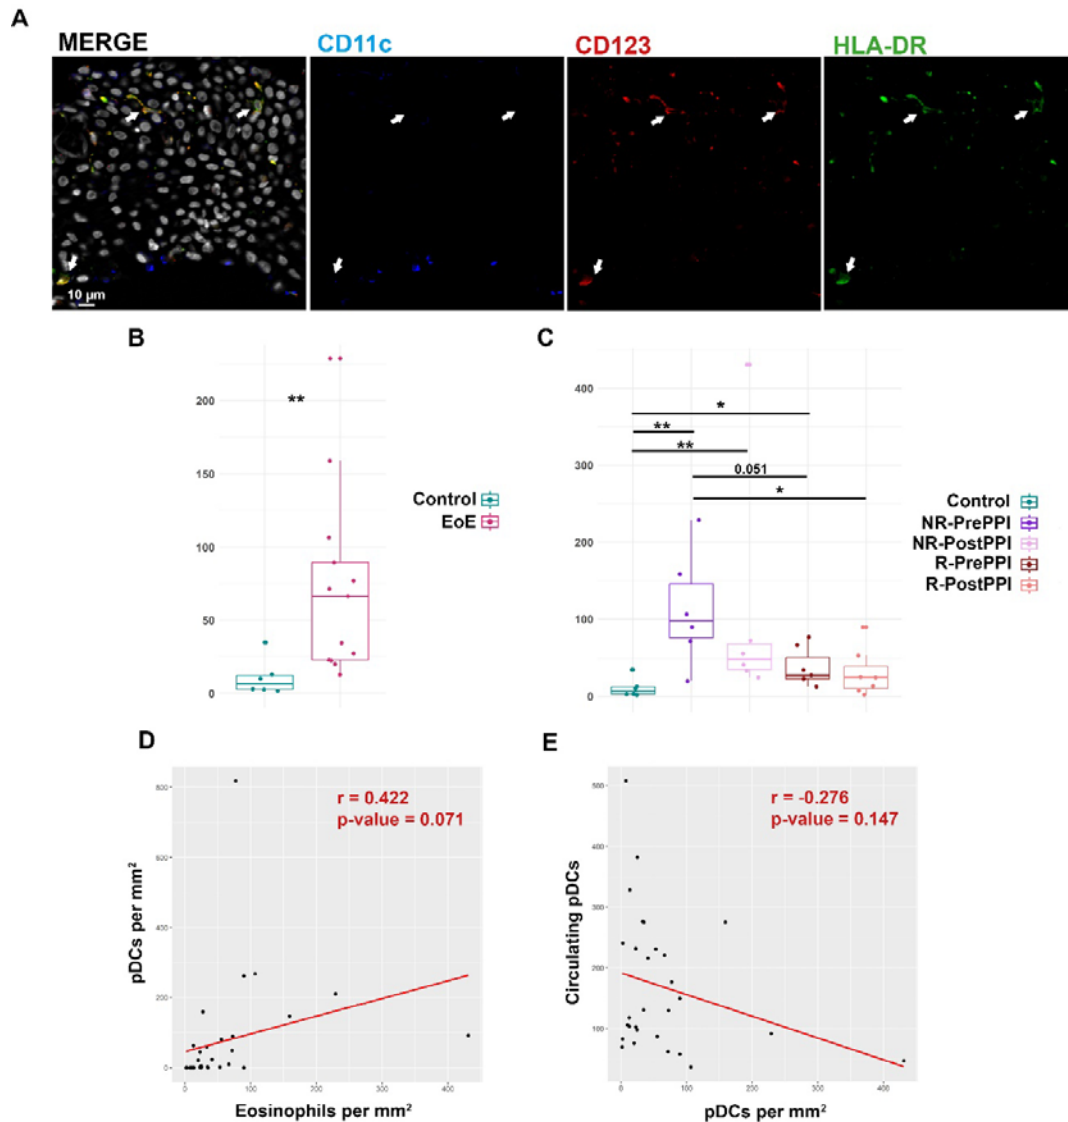

581

582 **Figure 7. pDC infiltration in esophageal biopsies of EoE patients (A)**  
 583 Immunofluorescence analysis of pDC infiltrate in esophageal biopsies from EoE  
 584 patients. pDCs were visualized as CD123<sup>+</sup>(red) CD11c<sup>-</sup> (blue), HLA-DR<sup>+</sup> (green) cells.  
 585 Arrows point to representative examples of pDC. Scale bar is shown. Nuclei were  
 586 stained with DAPI (represented in grey in merged images). **(B)** Boxplot representation  
 587 of infiltrating pDCs in controls (n=7) and EoE (n=13) patients at baseline. Relative  
 588 count per  $\text{mm}^2$ , group median and minimum and maximum values are represented.  
 589 Differences were analysed by Mann-Whitney test, considering p-values <0.05 as  
 590 statistically significant (\*p<0.05, \*\*p< 0.01, \*\*\*p< 0.001, \*\*\*\*p<0.0001). **(C)** Boxplot  
 591 representation of infiltrating pDCs in controls (n=7), responder (n=6) and non-  
 592 responder (n=7) pre-PPI and post-PPI. Relative count per  $\text{mm}^2$ , group median and  
 593 minimum and maximum values are represented. Differences were analysed by Mann-  
 594 Whitney test, considering p-values <0.05 as statistically significant (\*p<0.05, \*\*p< 0.01,  
 595 \*\*\*p< 0.001, \*\*\*\*p<0.0001). Responder (R), Non-Responder (NR), before treatment  
 596 (PrePPI), after treatment (PostPPI). **(D)** Pearson correlation between tissue eosinophil  
 597 count and tissue pDCs. Pearson correlation coefficient and p-value are shown. **(E)**

598 Pearson correlation between circulating pDC and tissue pDCs. Pearson correlation  
599 coefficient and p-value are shown.  
600

## 601 DISCUSSION

602 Using state-of-the-art spectral cytometry, we hereby describe, for the first time to our  
603 knowledge, a unique fingerprint in the circulating immunome of patients with EoE at the  
604 time of disease diagnosis characterized by a specific deficit of circulating pDCs.  
605 Indeed, their levels were further decreased at diagnosis in patients who did not  
606 respond to PPI treatment, while among those who did, circulating levels of this cell  
607 subset were restored to normal levels upon treatment. Moreover, when we evaluated  
608 the presence of pDCs in the esophagus their numbers correlated with the eosinophilic  
609 count, showing both an inverse correlation with circulating pDCs. Hence, our findings  
610 suggest a central role of pDCs in the pathogenesis of EoE and reveal them as potential  
611 novel non-invasive biomarkers to aid on disease diagnosis and predict subsequent  
612 response to PPI therapy.

613 In addition to our novel findings on pDCs, we found an increase in CD4<sup>+</sup>CD8<sup>-</sup> T-cells  
614 and CD8<sup>+</sup> Early Effectors (C-37 and C-69, respectively) in EoE patients at diagnosis,  
615 although these results could not be further confirmed by classical gating approaches.  
616 Increased levels of T-cells could be related with the active role of CD8<sup>+</sup>T cells in the  
617 esophageal inflammation in EoE<sup>30,31</sup> while the change in CD4<sup>+</sup>CD8<sup>-</sup> T-cells might be  
618 associated with their cytotoxic activity as described for other pathologies<sup>32</sup>, despite no  
619 role for these cells has been found in EoE.

620 PPI therapy is widely used in the management of EoE<sup>16,33</sup>, with a histologic remission  
621 rate of approximately 50%<sup>16</sup>. The reduction in Th2 signalling produced by this therapy  
622 leads to an improvement in the structural characteristics of the esophagus,  
623 accompanied by decreased eosinophil count. In our study, non-responding patients  
624 presented significant differences from responding patients (Figure 3A). When we  
625 studied these two groups PrePPI intake, non-responding patients had lower levels of  
626 pDCs, classical monocytes and an unknown myeloid APC cluster, but higher levels of  
627 non-memory B cells, mature NK cells and central memory CD4<sup>+</sup> T-cells. These results  
628 might indicate an increased antigen presentation activity, since they have decreased  
629 numbers of circulating APC populations, which are key in homeostasis and allergy  
630 response<sup>34</sup>. Indeed, latest results from our group<sup>35</sup> reinforce this hypothesis showing  
631 that non-responding patients' esophageal proteomic profile when compared to  
632 responding patients (both PrePPI), have increased levels of proteins associated with  
633 antigen presentation. These patients might have a more altered barrier in the  
634 esophagus, which increases the risk of antigen exposure, thereby favouring EoE  
635 worsening, as described before<sup>36-38</sup>. Although these findings need a deeper  
636 characterization, they unveil for the first time a differential immunological profile  
637 between patients that will or will not respond to PPI therapy and could open the door to  
638 a better profiling of refractory patients.

639 In addition, when we studied immune dynamics during PPI treatment, PPI-responding  
640 patients displayed a significant increase in circulating basophils (C-14) and pDCs (C-  
641 26) (Figure 4A). Basophils have a pivotal role in atopic diseases and are a major  
642 source of Th2 immunomodulation. The increased levels of these cells in patients who  
643 achieve remission after PPI therapy could be related to the reestablishment of  
644 immunological homeostasis, since during inflammation basophils are able to penetrate  
645 the inflamed esophagus<sup>39</sup>. A similar role may be played by circulating pDCs, which  
646 recover control values in PPI-responding patients PostPPI (Figure 5A). pDCs produce  
647 high levels of IFN- $\alpha\beta$  (type I). This cytokine impairs Th2 responses by blocking the

648 normal development of Th2 cells and production of Th2 cytokines (especially IL-5)<sup>40,41</sup>.  
649 The reduction in circulating pDCs during active esophageal inflammation could be  
650 indicating migration of these cells to the inflamed tissue to control the inflammatory  
651 response. Conceivably, circulating levels of these cells are restored when the patient  
652 achieves remission.

653 Importantly, the chemokine receptors CXCR3 and CCR7 related to pDC migration to  
654 tissues and homing to the LN<sup>28,29,42</sup> were expressed in circulating pDCs (Figure 6A) in  
655 our cohorts. Indeed, responders presented the most activated pDCs after PPI  
656 treatment (Figure 5B) while no significant changes were found in the case of non-  
657 responding patients. Together with the previous results, the observed low levels of  
658 pDCs in PrePPI and PostPPI non-responding patients (Figure 5A) and their less active  
659 circulating profile (Figure 6B), could be linked to a poor inhibition of the Th2 response  
660 by type I IFN or/and a more exacerbated mucosal barrier alteration and therefore a  
661 worse prognosis<sup>36,40</sup>.

662 Focusing on promising minimally invasive biomarkers, pDCs are a potentially  
663 interesting candidate since they are highly related with EoE onset and the response to  
664 treatment. We have observed an inverse correlation between circulating pDCs and the  
665 peak eosinophil count in esophageal biopsies (Figure 5B). Moreover, when we  
666 evaluated tissue pDC levels in patient's biopsies we found a positive correlation  
667 between these cells and the proportion of eosinophils per mm<sup>2</sup> (Figure 7D), being also  
668 inversely correlated to pDC circulating levels (Figure 7E). In patients, the number of  
669 tissue pDCs was higher when the esophageal inflammation was active, reducing their  
670 abundance when the inflammation was under control (Figure 7C). However, Responder  
671 patients do not reach control values after treatment despite pDC levels tend to be  
672 lower. This could be due to a non-complete recovery state, in which these cells  
673 participate in the restoration of the esophageal homeostasis as happens in other  
674 pathologies<sup>43</sup> where tissue healing plays a key role. Thus, it may be that the evaluation  
675 of tissue pDC levels in long-term recovered patients would reveal closer numbers to  
676 the control.

677 Hence, this population is related with the inflammatory status of the esophagus, thus  
678 providing information of clinical diagnostic parameters that until now can only be  
679 measured through invasive procedures. In peripheral blood, previous works have  
680 related an increase in Th2 profile to active EoE<sup>44</sup>, while others have associated this to  
681 eosinophil phenotype or maturation state<sup>45,46</sup>. Also, single cell studies have described  
682 T-cell heterogeneity in the inflamed tissue, defining a specific enrichment in resident  
683 CD4<sup>+</sup> T regulatory and Th2 effector cells together with an increased CD4<sup>+</sup>/CD8<sup>+</sup>  
684 circulating T-cell ratio<sup>47</sup>. Nevertheless, none of these parameters is being used as  
685 biomarker for EoE diagnosis, or for the prediction of response to PPI treatment, for  
686 which the peripheral eosinophil count has been proposed as a possible predictor<sup>48</sup>.

687 We are aware that advances in biomarker discovery in EoE are hampered by several  
688 pitfalls, such as the common concurrence of atopic diseases and the dissociation  
689 between the esophageal inflammation and patient's symptoms<sup>23</sup>. Accordingly, despite  
690 our cohorts are highly controlled and paired samples from the same patients were  
691 analysed, further studies and validations are needed to confirm the utility of circulating  
692 pDCs as biomarker. The activity of this cluster must be compared in cohorts with other  
693 allergic and atopic conditions, since in these pathologies a decreased peripheral pDC  
694 count was found, together with pDC infiltration in the inflamed tissue<sup>49-51</sup>. Probably, its  
695 visualization through classic cytometry approaches and its combination with other non-

696 invasive clinical parameters would be helpful to establish a specific signature for EoE  
697 management and PPI response prediction, also opening the door to study its utility in  
698 the case of other therapy options for EoE.

699 In summary, we have described, for the first time to our knowledge, the circulating  
700 immunome of EoE patients at the time of diagnosis highlighting as well the differences  
701 between PPI-responding and non-responding patients. Altogether, our study provides  
702 new insights on EoE immunity and sheds light on the characterization of this disorder,  
703 proposing a potential biomarker for diagnosis and prediction of response to treatment,  
704 which could improve decisions on better treatment options.

705

## 706 REFERENCES

707

- 708 1. Navarro, P., Arias, Á., Arias-González, L., Laserna-Mendieta, E.J., Ruiz-Ponce, M., and  
709 Lucendo, A.J. (2019). Systematic review with meta-analysis: the growing incidence and  
710 prevalence of eosinophilic oesophagitis in children and adults in population-based  
711 studies. *Aliment Pharmacol Ther* *49*, 1116–1125. [10.1111/APT.15231](https://doi.org/10.1111/APT.15231).
- 712 2. Arias, Á., and Lucendo, A.J. (2019). Incidence and prevalence of eosinophilic  
713 oesophagitis increase continuously in adults and children in Central Spain: A 12-year  
714 population-based study. *Dig Liver Dis* *51*, 55–62. [10.1016/J.DLD.2018.07.016](https://doi.org/10.1016/J.DLD.2018.07.016).
- 715 3. Lucendo, A.J., Molina-Infante, J., Arias, Á., von Arnim, U., Bredenoord, A.J., Bussmann,  
716 C., Amil Dias, J., Bove, M., González-Cervera, J., Larsson, H., et al. (2017). Guidelines on  
717 eosinophilic esophagitis: evidence-based statements and recommendations for  
718 diagnosis and management in children and adults. *United European Gastroenterol J* *5*,  
719 335–358. [10.1177/2050640616689525](https://doi.org/10.1177/2050640616689525).
- 720 4. Hirano, I., Chan, E.S., Rank, M.A., Sharaf, R.N., Stollman, N.H., Stukus, D.R., Wang, K.,  
721 Greenhawt, M., Falck-Ytter, Y.T., Chachu, K.A., et al. (2020). AGA Institute and the Joint  
722 Task Force on Allergy-Immunology Practice Parameters Clinical Guidelines for the  
723 Management of Eosinophilic Esophagitis. *Gastroenterology* *158*, 1776–1786.  
724 [10.1053/J.GASTRO.2020.02.038](https://doi.org/10.1053/J.GASTRO.2020.02.038).
- 725 5. Schoepfer, A., and Safroneeva, E. (2014). Activity assessment of eosinophilic  
726 esophagitis. *Dig Dis* *32*, 98–101. [10.1159/000357081](https://doi.org/10.1159/000357081).
- 727 6. McCormick, J.P., and Lee, J.T. (2021). Insights into the Implications of Coexisting Type 2  
728 Inflammatory Diseases. *J Inflamm Res* *14*, 4259–4266. [10.2147/JIR.S311640](https://doi.org/10.2147/JIR.S311640).
- 729 7. González-Cervera, J., Arias, Á., Redondo-González, O., Cano-Mollinedo, M.M.,  
730 Terreehorst, I., and Lucendo, A.J. (2017). Association between atopic manifestations  
731 and eosinophilic esophagitis: A systematic review and meta-analysis. *Annals of Allergy,*  
732 *Asthma and Immunology* *118*, 582-590.e2. [10.1016/j.anai.2017.02.006](https://doi.org/10.1016/j.anai.2017.02.006).
- 733 8. Greuter, T., Alexander, J.A., Straumann, A., and Katzka, D.A. (2018). Diagnostic and  
734 Therapeutic Long-term Management of Eosinophilic Esophagitis—Current Concepts and  
735 Perspectives for Steroid Use. *Clin Transl Gastroenterol* *9*. [10.1038/S41424-018-0074-8](https://doi.org/10.1038/S41424-018-0074-8).
- 736 9. Molina-Infante, J., and Lucendo, A.J. (2017). Proton Pump Inhibitor Therapy for  
737 Eosinophilic Esophagitis: A Paradigm Shift. *Am J Gastroenterol* *112*, 1770–1773.  
738 [10.1038/AJG.2017.404](https://doi.org/10.1038/AJG.2017.404).

- 739 10. Laserna-Mendieta, E.J., Casabona, S., Savarino, E., Perelló, A., Pérez-Martínez, I.,  
740 Guagnozzi, D., Barrio, J., Guardiola, A., Asensio, T., de la Riva, S., et al. (2020). Efficacy of  
741 Therapy for Eosinophilic Esophagitis in Real-World Practice. *Clin Gastroenterol Hepatol*  
742 *18*, 2903-2911.e4. 10.1016/J.CGH.2020.01.024.
- 743 11. Molina-Infante, J., and Lucendo, A.J. (2020). Approaches to diet therapy for eosinophilic  
744 esophagitis. *Curr Opin Gastroenterol* *36*, 359–363. 10.1097/MOG.0000000000000645.
- 745 12. Molina-Infante, J., Bredenoord, A.J., Cheng, E., Dellon, E.S., Furuta, G.T., Gupta, S.K.,  
746 Hirano, I., Katzka, D.A., Moawad, F.J., Rothenberg, M.E., et al. (2016). Proton pump  
747 inhibitor-responsive oesophageal eosinophilia: an entity challenging current diagnostic  
748 criteria for eosinophilic oesophagitis. *Gut* *65*, 521–531. 10.1136/GUTJNL-2015-310991.
- 749 13. Dellon, E.S., Rothenberg, M.E., Collins, M.H., Hirano, I., Chehade, M., Bredenoord, A.J.,  
750 Lucendo, A.J., Spergel, J.M., Aceves, S., Sun, X., et al. (2022). Dupilumab in Adults and  
751 Adolescents with Eosinophilic Esophagitis. *N Engl J Med* *387*, 2317–2330.  
752 10.1056/NEJMOA2205982.
- 753 14. Uchida, A.M., Burk, C.M., Rothenberg, M.E., Furuta, G.T., and Spergel, J.M. (2023).  
754 Recent advances in the treatment of eosinophilic esophagitis. *J Allergy Clin Immunol*  
755 *Pract O*. 10.1016/j.jaip.2023.06.035.
- 756 15. Laserna-Mendieta, E.J., Navarro, P., Casabona-Francés, S., Savarino, E. V., Pérez-  
757 Martínez, I., Guagnozzi, D., Barrio, J., Perello, A., Guardiola-Arévalo, A., Betoré-Glaria,  
758 M.E., et al. (2023). Differences between childhood- and adulthood-onset eosinophilic  
759 esophagitis: An analysis from the EoE connect registry. *Dig Liver Dis* *55*, 350–359.  
760 10.1016/J.DLD.2022.09.020.
- 761 16. Laserna-Mendieta, E.J., Casabona, S., Guagnozzi, D., Savarino, E., Perelló, A., Guardiola-  
762 Arévalo, A., Barrio, J., Pérez-Martínez, I., Lund Krarup, A., Alcedo, J., et al. (2020).  
763 Efficacy of proton pump inhibitor therapy for eosinophilic oesophagitis in 630 patients:  
764 results from the EoE connect registry. *Aliment Pharmacol Ther* *52*, 798–807.  
765 10.1111/APT.15957.
- 766 17. Van Rhijn, B.D., Warners, M.J., Curvers, W.L., Van Lent, A.U., Bekkali, N.L., Takkenberg,  
767 R.B., Kloek, J.J., Bergman, J.J.G.H.M., Fockens, P., and Bredenoord, A.J. (2014).  
768 Evaluating the endoscopic reference score for eosinophilic esophagitis: moderate to  
769 substantial intra- and interobserver reliability. *Endoscopy* *46*, 1049–1055. 10.1055/S-  
770 0034-1377781.
- 771 18. Lucendo, A.J., and Molina-Infante, J. (2016). Limitation of Symptoms as Predictors of  
772 Remission in Eosinophilic Esophagitis: The Need to Go Beyond Endoscopy and  
773 Histology. *Gastroenterology* *150*, 547–549. 10.1053/J.GASTRO.2016.01.014.
- 774 19. Wen, T., Stucke, E.M., Grotjan, T.M., Kemme, K.A., Abonia, J.P., Putnam, P.E., Franciosi,  
775 J.P., Garza, J.M., Kaul, A., King, E.C., et al. (2013). Molecular diagnosis of eosinophilic  
776 esophagitis by gene expression profiling. *Gastroenterology* *145*, 1289–1299.  
777 10.1053/J.GASTRO.2013.08.046.
- 778 20. Rochman, M., Wen, T., Kotliar, M., Dexheimer, P.J., Morgenstern, N.B.B., Caldwell, J.M.,  
779 Lim, H.W., and Rothenberg, M.E. (2022). Single-cell RNA-Seq of human esophageal



- 780 epithelium in homeostasis and allergic inflammation. *JCI Insight* 7.  
781 10.1172/JCI.INSIGHT.159093.
- 782 21. Rochman, M., Azouz, N.P., and Rothenberg, M.E. (2018). Epithelial origin of eosinophilic  
783 esophagitis. *Journal of Allergy and Clinical Immunology* 142, 10–23.  
784 10.1016/J.JACI.2018.05.008.
- 785 22. Molina-Jiménez, F., Ugalde-Triviño, L., Arias-González, L., Relaño-Rupérez, C., Casabona,  
786 S., Pérez-Fernández, M.T., Martín-Domínguez, V., Fernández-Pacheco, J.,  
787 Laserna-Mendieta, E.J., Muñoz-Hernández, P., et al. (2023). Proteomic analysis of the  
788 esophageal epithelium reveals key features of eosinophilic esophagitis  
789 pathophysiology. *Allergy*. 10.1111/ALL.15779.
- 790 23. Rossi, C.M., Lenti, M.V., and Di Sabatino, A. (2022). The need for a reliable non-invasive  
791 diagnostic biomarker for eosinophilic oesophagitis. *Lancet Gastroenterol Hepatol* 7,  
792 202–203. 10.1016/S2468-1253(21)00468-4.
- 793 24. Hirano, I., Moy, N., Heckman, M.G., Thomas, C.S., Gonsalves, N., and Achem, S.R.  
794 (2013). Endoscopic assessment of the oesophageal features of eosinophilic  
795 oesophagitis: validation of a novel classification and grading system. *Gut* 62, 489–495.  
796 10.1136/GUTJNL-2011-301817.
- 797 25. Collins, M.H., Martin, L.J., Alexander, E.S., Todd Boyd, J., Sheridan, R., He, H., Pentiuik,  
798 S., Putnam, P.E., Abonia, J.P., Mukkada, V.A., et al. (2017). Newly developed and  
799 validated eosinophilic esophagitis histology scoring system and evidence that it  
800 outperforms peak eosinophil count for disease diagnosis and monitoring. *Dis Esophagus*  
801 30. 10.1111/DOTE.12470.
- 802 26. Park, L.M., Lannigan, J., and Jaimes, M.C. (2020). OMIP-069: Forty-Color Full Spectrum  
803 Flow Cytometry Panel for Deep Immunophenotyping of Major Cell Subsets in Human  
804 Peripheral Blood. *Cytometry A* 97, 1044–1051. 10.1002/CYTO.A.24213.
- 805 27. McInnes, L., Healy, J., Saul, N., and Großberger, L. (2018). UMAP: Uniform Manifold  
806 Approximation and Projection. *J Open Source Softw* 3, 861. 10.21105/JOSS.00861.
- 807 28. Vanbervliet, B., Bendriss-Vermare, N., Massacrier, C., Homey, B., De Bouteiller, O.,  
808 Brière, F., Trinchieri, G., and Caux, C. (2003). The Inducible CXCR3 Ligands Control  
809 Plasmacytoid Dendritic Cell Responsiveness to the Constitutive Chemokine Stromal  
810 Cell-derived Factor 1 (SDF-1)/CXCL12. *J Exp Med* 198, 823. 10.1084/JEM.20020437.
- 811 29. Seth, S., Oberdörfer, L., Hyde, R., Hoff, K., Thies, V., Worbs, T., Schmitz, S., and Förster,  
812 R. (2011). CCR7 Essentially Contributes to the Homing of Plasmacytoid Dendritic Cells to  
813 Lymph Nodes under Steady-State As Well As Inflammatory Conditions. *The Journal of*  
814 *Immunology* 186, 3364–3372. 10.4049/JIMMUNOL.1002598.
- 815 30. Anilkumar, A.A., Beppu, L., Kurten, R., Newbury, R., Dohil, R., Broide, D., and Aceves,  
816 S.S. (2014). CD3 and CD8 Cells Produce IL-9 In Pediatric Eosinophilic Esophagitis. *Journal*  
817 *of Allergy and Clinical Immunology* 133, AB288. 10.1016/j.jaci.2013.12.1017.
- 818 31. Abdolahi, M., Rasouli, S., Babaie, D., Dara, N., Imanzadeh, F., Sayyari, A., Rouhani, P.,  
819 Khatami, K., Kazemiaghdam, M., Nilipour, Y., et al. (2021). Increased regulatory T cells in  
820 peripheral blood of children with eosinophilic esophagitis. *Gastroenterol Hepatol Bed*  
821 *Bench* 14, 25–30.

- 822 32. Wu, Z., Zheng, Y., Sheng, J., Han, Y., Yang, Y., Pan, H., and Yao, J. (2022). CD3+CD4-CD8-  
823 (Double-Negative) T Cells in Inflammation, Immune Disorders and Cancer. *Front*  
824 *Immunol* 13, 388. 10.3389/FIMMU.2022.816005/BIBTEX.
- 825 33. Chang, J.W., Saini, S.D., Mellinger, J.L., Chen, J.W., Zikmund-Fisher, B.J., and Rubenstein,  
826 J.H. (2019). Management of eosinophilic esophagitis is often discordant with guidelines  
827 and not patient-centered: results of a survey of gastroenterologists. *Dis Esophagus* 32.  
828 10.1093/DOTE/DOY133.
- 829 34. Schülke, S., Gilles, S., Jirno, A.C., and Mayer, J.U. (2023). Tissue-specific  
830 antigen-presenting cells contribute to distinct phenotypes of allergy. *Eur J Immunol*,  
831 2249980. 10.1002/EJI.202249980.
- 832 35. Molina-Jiménez, F., Ugalde-Triviño, L., Arias-González, L., Relaño-Rupérez, C., Casabona,  
833 S., Moreno-Monteagudo, J.A., Pérez-Fernández, M.T., Martín-Domínguez, V.,  
834 Fernández-Pacheco, J., Laserna-Mendieta, E.J., et al. (2023). Proton pump Inhibitor  
835 effect on esophageal protein signature of eosinophilic esophagitis, prediction and  
836 evaluation of treatment response. *medRxiv*, 2023.11.21.23298292.  
837 10.1101/2023.11.21.23298292.
- 838 36. Chen, J., Oshima, T., Huang, X., Tomita, T., Fukui, H., and Miwa, H. (2022). Esophageal  
839 Mucosal Permeability as a Surrogate Measure of Cure in Eosinophilic Esophagitis. *J Clin*  
840 *Med* 11. 10.3390/JCM11144246.
- 841 37. Furuta, G.T., Fillon, S.A., Williamson, K.M., Robertson, C.E., Stevens, M.J., Aceves, S.S.,  
842 Arva, N.C., Chehade, M., Collins, M.H., Davis, C.M., et al. (2023). Mucosal Microbiota  
843 Associated With Eosinophilic Esophagitis and Eosinophilic Gastritis. *J Pediatr*  
844 *Gastroenterol Nutr* 76, 347–354. 10.1097/MPG.0000000000003685.
- 845 38. Kleuskens, M.T.A., Bek, M.K., Al Halabi, Y., Blokhuis, B.R.J., Diks, M.A.P., Haasnoot, M.L.,  
846 Garssen, J., Bredenoord, A.J., C.A.M. van Esch, B., and Redegeld, F.A. (2023). Mast cells  
847 disrupt the function of the esophageal epithelial barrier. *Mucosal Immunol*.  
848 10.1016/J.MUCIMM.2023.06.001.
- 849 39. Marković, I., and Savvides, S.N. (2020). Modulation of Signaling Mediated by TSLP and  
850 IL-7 in Inflammation, Autoimmune Diseases, and Cancer. *Front Immunol* 11.  
851 10.3389/FIMMU.2020.01557.
- 852 40. Pritchard, A.L., Carroll, M.L., Burel, J.G., White, O.J., Phipps, S., and Upham, J.W. (2012).  
853 Innate IFNs and Plasmacytoid Dendritic Cells Constrain Th2 Cytokine Responses to  
854 Rhinovirus: A Regulatory Mechanism with Relevance to Asthma. *The Journal of*  
855 *Immunology* 188, 5898–5905. 10.4049/JIMMUNOL.1103507.
- 856 41. Lin, J.Y., Wu, W.H., Chen, J.S., Liu, I.L., Chiu, H.L., Chen, H.W., Tsai, T.L., Huang, Y.L., and  
857 Wang, L.F. (2020). Plasmacytoid dendritic cells suppress Th2 responses induced by  
858 epicutaneous sensitization. *Immunol Cell Biol* 98, 215–228. 10.1111/IMCB.12315.
- 859 42. Kohrgruber, N., Gröger, M., Meraner, P., Kriehuber, E., Petzelbauer, P., Brandt, S.,  
860 Stingl, G., Rot, A., and Maurer, D. (2004). Plasmacytoid Dendritic Cell Recruitment by  
861 Immobilized CXCR3 Ligands. *The Journal of Immunology* 173, 6592–6602.  
862 10.4049/JIMMUNOL.173.11.6592.

- 863 43. Gregorio, J., Meller, S., Conrad, C., Di Nardo, A., Homey, B., Lauerma, A., Arai, N., Gallo,  
864 R.L., DiGiovanni, J., and Gilliet, M. (2010). Plasmacytoid dendritic cells sense skin injury  
865 and promote wound healing through type I interferons. *J Exp Med* 207, 2921.  
866 10.1084/JEM.20101102.
- 867 44. Adel-Patient, K., Campeotto, F., Grauso, M., Guillon, B., Moroldo, M., Venot, E.,  
868 Dietrich, C., Machavoine, F., Castelli, F.A., Fenaille, F., et al. (2023). Assessment of local  
869 and systemic signature of eosinophilic esophagitis (EoE) in children through multi-omics  
870 approaches. *Front Immunol* 14. 10.3389/FIMMU.2023.1108895.
- 871 45. Perez-Lucendo, I., Gomez Torrijos, E., Donado, P., Melero, R., Feo-Brito, F., and Urra,  
872 J.M. (2021). Low Expression of ICAM-1 in Blood Eosinophils in Patients With Active  
873 Eosinophilic Esophagitis. *J Investig Allergol Clin Immunol* 31, 316–321.  
874 10.18176/JIACI.0489.
- 875 46. Henderson, A., Magier, A., Schwartz, J.T., Martin, L.J., Collins, M.H., Putnam, P.E.,  
876 Mukkada, V.A., Abonia, J.P., Rothenberg, M.E., and Fulkerson, P.C. (2020). Monitoring  
877 Eosinophilic Esophagitis Disease Activity With Blood Eosinophil Progenitor Levels. *J*  
878 *Pediatr Gastroenterol Nutr* 70, 482–488. 10.1097/MPG.0000000000002583.
- 879 47. Wen, T., Aronow, B.J., Rochman, Y., Rochman, M., Kiran, K.C., Dexheimer, P.J., Putnam,  
880 P., Mukkada, V., Foote, H., Rehn, K., et al. (2019). Single-cell RNA sequencing identifies  
881 inflammatory tissue T cells in eosinophilic esophagitis. *J Clin Invest* 129, 2014–2028.  
882 10.1172/JCI125917.
- 883 48. Alexander, R., Alexander, J.A., Akambase, J., Harmsen, W.S., Geno, D., Tholen, C.,  
884 Katzka, D.A., and Ravi, K. (2021). Proton Pump Inhibitor Therapy in Eosinophilic  
885 Esophagitis: Predictors of Nonresponse. *Dig Dis Sci* 66, 3096–3104. 10.1007/S10620-  
886 020-06633-4.
- 887 49. Albanesi, C., Scarponi, C., Pallotta, S., Daniele, R., Bosisio, D., Madonna, S., Fortugno, P.,  
888 Gonzalvo-Feo, S., Franssen, J.D., Parmentier, M., et al. (2009). Chemerin expression  
889 marks early psoriatic skin lesions and correlates with plasmacytoid dendritic cell  
890 recruitment. *J Exp Med* 206, 249–258. 10.1084/JEM.20080129.
- 891 50. Saadeh, D., Kurban, M., and Abbas, O. (2016). Update on the role of plasmacytoid  
892 dendritic cells in inflammatory/autoimmune skin diseases. *Exp Dermatol* 25, 415–421.  
893 10.1111/EXD.12957.
- 894 51. Charles, J., Chaperot, L., Salameire, D., Domizio, J. Di, Aspor, C., Gressin, R., Jacob, M.-  
895 C., Richard, M.-J., Beani, J.-C., Plumas, J., et al. (2010). Plasmacytoid dendritic cells and  
896 dermatological disorders: focus on their role in autoimmunity and cancer. *Eur J*  
897 *Dermatol* 20, 16. 10.1684/EJD.2010.0816.

898

899 **Supplementary Figure 1.** Hierarchical gating strategy for cluster classification.  
900 Representative gating strategy used to identify the main leukocyte populations within  
901 total peripheral blood mononuclear cells (PBMC). Arrows and gates are used to  
902 visualize the relationships across plots. After doublets and dead cells were excluded,  
903 basophils were identified as CD45+CD123+CD38+ cells. Monocytes were gated based  
904 on FSC-A/SSC-A properties and further classified into non-classical (CD14–CD16+),

905 intermediate (CD14+CD16+/low), and classical (CD14+CD16-). Within the lymphocyte  
906 gate, T-cells were identified based on the expression of CD3. Total  $\gamma\delta$  T-cells were  
907 identified as CD3+ $\gamma\delta$  T-cell receptor (TCR)+ and subdivided based on the expression  
908 of CD45RA and CCR7. Total NKT-like cells were identified in the CD3+ $\gamma\delta$ TCR-  
909 compartment as CD56+. The inclusion of CD2 and CD8 further classified the NKT-like  
910 cells. Total T-cells were defined as CD3+ $\gamma\delta$ TCR-CD56- and further divided into CD4+,  
911 CD8+, CD4+CD8+ and CD4-CD8- T-cells. Within total CD4+ T-cells and CD8+ T-  
912 cells, CCR7, CD45RA, CD27, and CD28 were further used to divide them into different  
913 T-cell phenotypes. B-cells were gated from the CD3- $\gamma\delta$ TCR- as CD19+ and/or CD20+  
914 cells. B-cells were further classified as IgD+CD27-, IgD+CD27+, or IgD-CD27+/-; the  
915 IgD-CD27+/- subset was divided into plasmablasts or IgD- memory B cells based on  
916 CD20 expression and CD27. Memory cells were classified into IgM+ or IgG+. NK cells  
917 were defined within the lymphocyte gate as CD3- $\gamma\delta$ TCR- and classified as early NK  
918 (CD56+CD16-), mature NK (CD56+CD16+), and terminal NK (CD56-CD16+) cells.  
919 Dendritic cells were identified within CD3-CD19- as CD14-CD16-. Further gating  
920 identified CD123+CD45RA+ cells as plasmacytoid DCs, (pDC) and CD123-CD11c+ as  
921 classical or conventional DC (cDC). cDC were divided into type 1 (CD141+, cDC1) and  
922 type 2 (CD1c+, cDC2).

923

924 **Supplementary Figure 2.** Gating strategy for significant cluster validation. Statistically  
925 significant cell clusters identified in Table 1 among the different comparisons performed  
926 were further validated by identification following classical hierarchical gating  
927 approaches. C-56 was gated from central memory CD4+ CD127+ cells. C-69 was  
928 identified from early CD8 effectors as CD38+ CD314+ PD1+ CXCR3+CD95+ cells. C-  
929 37 was identified from CD8-CD4- cells as CD314+ CD45RA+ CD2+ CD159a+. C-4  
930 subset was identified as mature NK CD45RA+ CD314+ CD14+ CCR5+ CD2+ CD57+  
931 CD159a+ cells. C-22 was gated from non-memory CD27- cell as IgM+ CXCR3- cells.  
932 C-26 was defined as CD38+ CD141+ CD4+ CCR5+. C-27 was classified from classical  
933 monocytes as IgG+ CD38+ CD39+ CXCR3+ CD95+ cells. C-33 was gated as CD19-  
934 CD3- CD14- CD56- CXCR3+ CCR7+.

935

936 **Supplementary Figure 3.** Marker expression on the UMAP from peripheral blood  
937 mononuclear cells. Surface expression intensities of all 37 analysed markers are  
938 shown by a colour code based on the intensity. Red represents higher expression and  
939 blue represents lower expression

940

941 **Supplementary Figure 4.** Non-Responders do not recover pDC values after  
942 treatment. (A) Volcano plot of differential analysis between NR-PrePPI (n=9) and NR-  
943 PostPPI (n=9). LogFC and -Log(p-value) are represented. (B) UMAP representation  
944 from NR-PrePPI and PostPPI patients with pDC coloured. (C) Validation by classic  
945 gating of pDC as shown in Supplementary Figures 1 and 2. Boxplot with pDC  
946 represents individual percentage of total value, group median and minimum and  
947 maximum values. Red line indicates paired PrePPI and PostPPI samples. Differences  
948 were analysed by paired t-test analysis considering p-values <0.05 as statistically

949 significant (\* $p < 0.05$ ) (n=7). Non-Responder (NR), before treatment (PrePPI), after  
950 treatment (PostPPI).

951

952 **Supplementary Table 1.** Specificity, fluorochrome, clone and provider of the different  
953 antibodies used.

954

955 **Supplementary Table 2.** Cell cluster identification from control and EoE patients. For  
956 each of the 73 identified FlowSOM clusters its ontogeny and subset is shown, together  
957 with the specific subset, phenotype and expression of functional markers. Markers  
958 highlighted in bold denote differential expression within the same population.

959

960

961

962

963

964

965

966

**A**

## C-26 Dendritic cells pDC

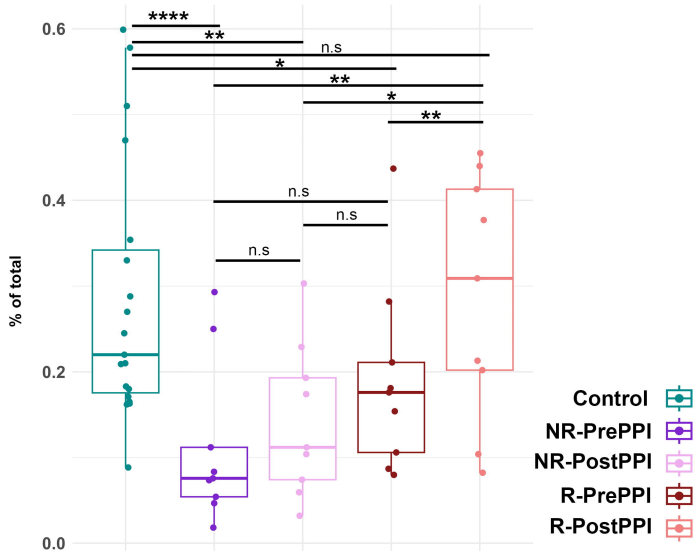**B**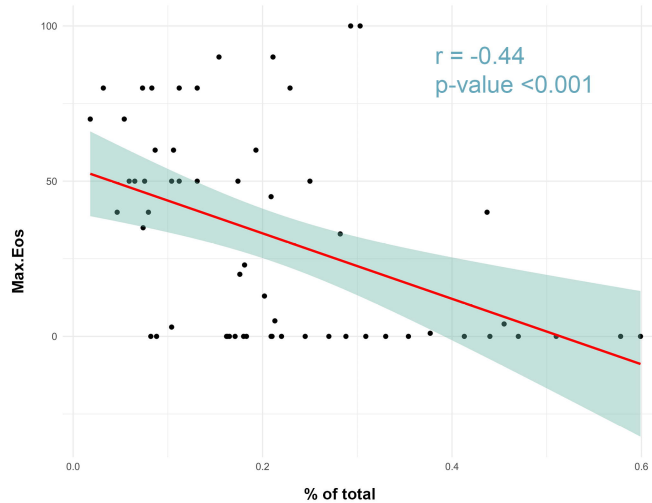

**A**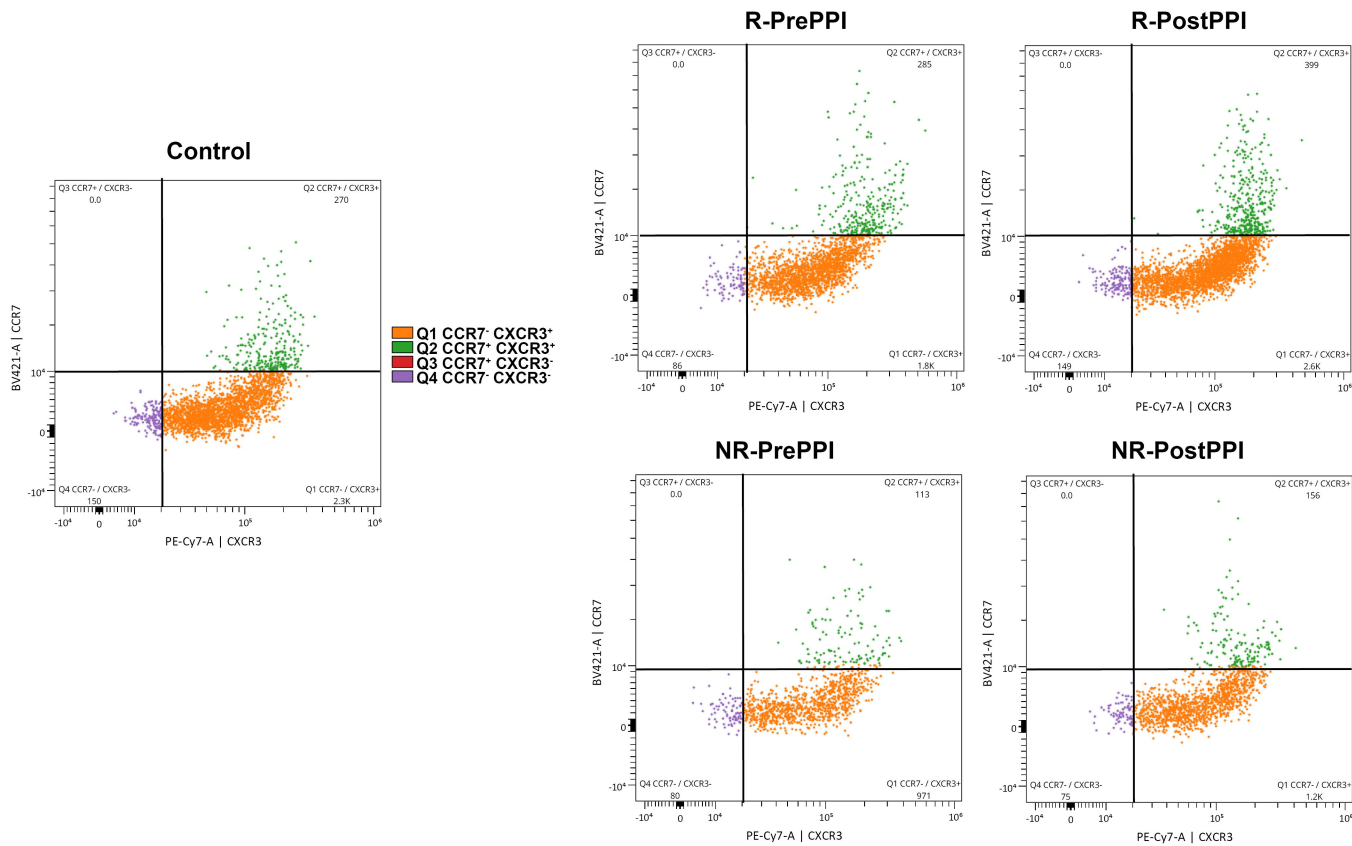**B**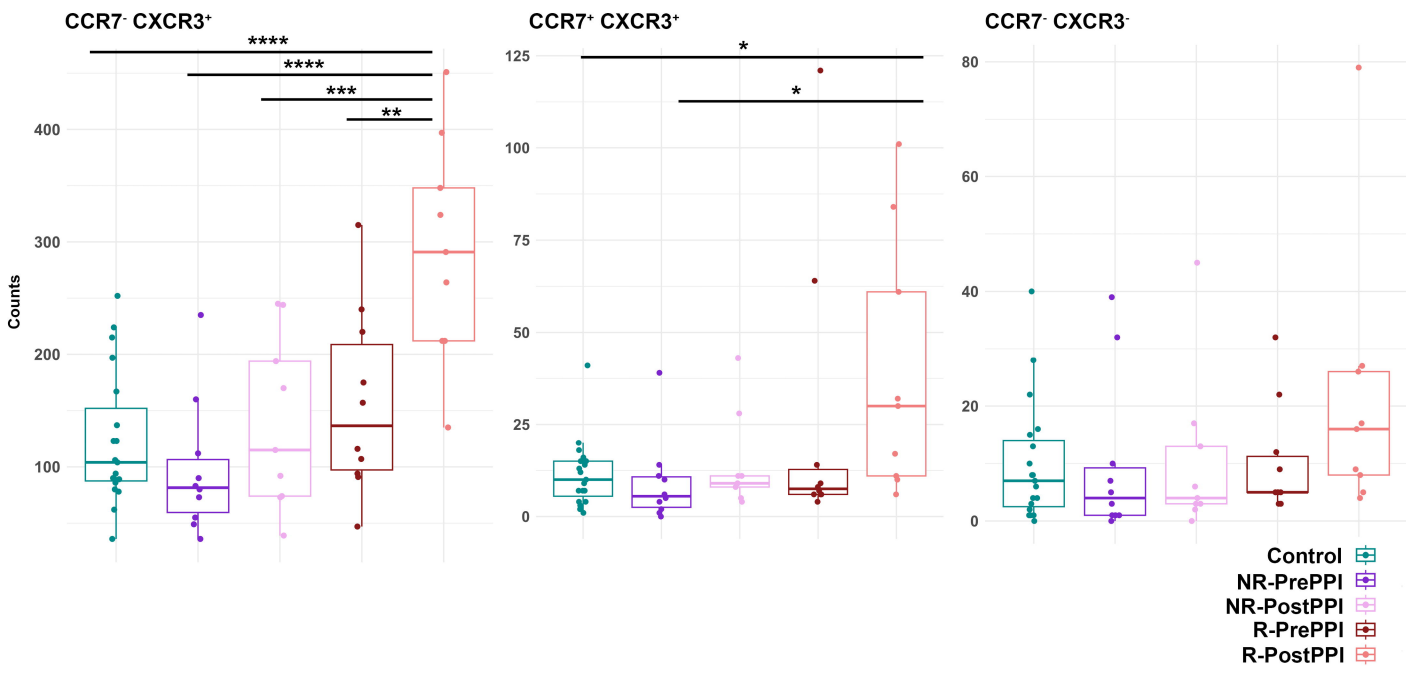

A

MERGE

CD11c

CD123

HLA-DR

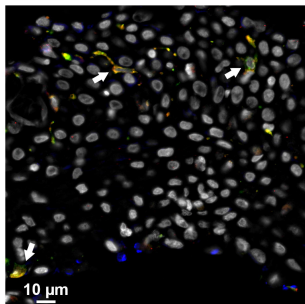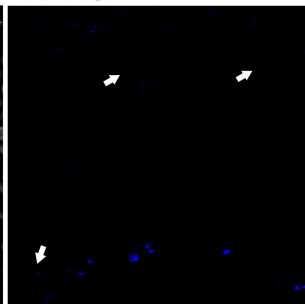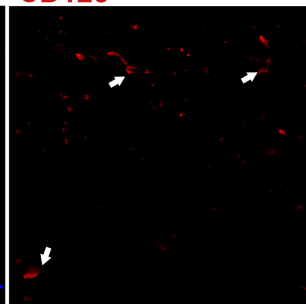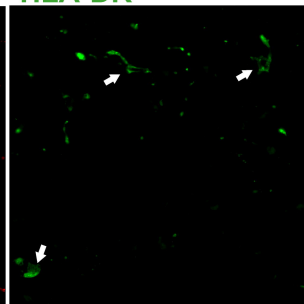

B

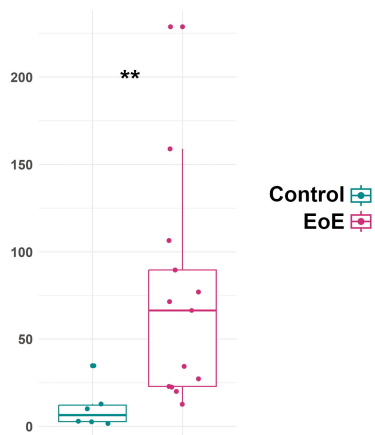

C

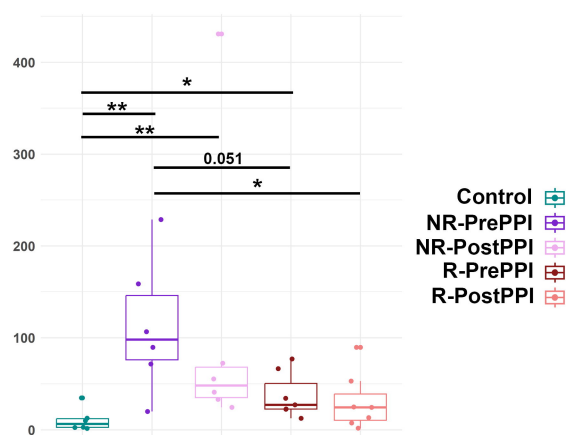

D

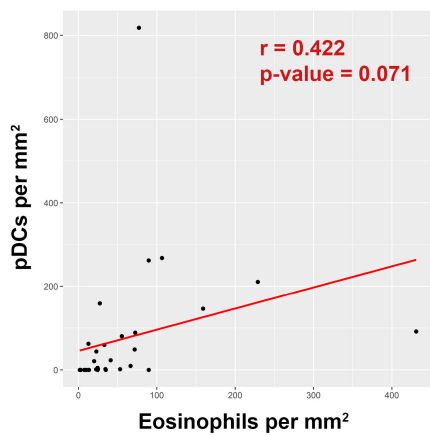

E

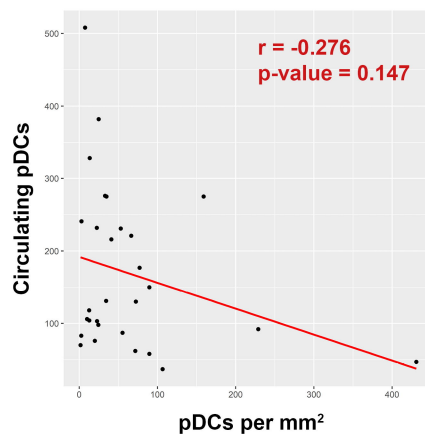



|                                                       | Control<br>(n=19) | EoE<br>(n=25)    | p-value | Responders<br>(n=9) | Non-Responders<br>(n=9) | p-value |
|-------------------------------------------------------|-------------------|------------------|---------|---------------------|-------------------------|---------|
| Sex (male) (n,%)                                      | 13 (68%)          | 20 (80%)         | 0.488   | 7 (77%)             | 7 (77%)                 | 1       |
| Age (mean years $\pm$ s.d.)                           | 34.42 $\pm$ 10.93 | 41 $\pm$ 13.7    | 0.060   | 33 $\pm$ 12.85      | 44 $\pm$ 14.95          | 0.152   |
| <i>Symptoms (n,%)</i>                                 |                   |                  |         |                     |                         |         |
| Dysphagia                                             | 0                 | 23 (92%)         | <0.001  | 9 (100%)            | 9 (100%)                | 1       |
| Food impaction                                        | 0                 | 16 (64%)         | <0.001  | 7 (77%)             | 5 (55%)                 | 0.619   |
| Heartburn                                             | 0                 | 10 (40%)         | 0.002   | 3 (33%)             | 3 (33%)                 | 1       |
| Abdominal pain                                        | 0                 | 0 (0%)           | 1       | 0 (0%)              | 0 (0%)                  | 1       |
| <i>Any atopic disease (n,%)</i>                       |                   |                  |         |                     |                         |         |
| Asthma                                                | 0                 | 5 (22%)          | 0.053   | 3 (33%)             | 1 (11%)                 | 0.573   |
| Allergic rhinitis/sinusitis                           | 1 (5%)            | 19 (82%)         | <0.001  | 8 (88%)             | 9 (100%)                | 1       |
| Food allergy                                          | 2 (10%)           | 11 (48%)         | 0.0173  | 5 (55%)             | 3 (33%)                 | 0.637   |
| <i>Endoscopic findings (n,%)</i>                      |                   |                  |         |                     |                         |         |
| EREFS (mean $\pm$ s.d.)                               | 0                 | 3.36 $\pm$ 2     | <0.001  | 2.44 $\pm$ 2.06     | 3.88 $\pm$ 1.26         | 0.097   |
| EREFS PostPPI (mean $\pm$ s.d.)                       | -                 | -                | -       | 1.44 $\pm$ 1.51     | 4.33 $\pm$ 1            | <0.001  |
| Maximum eosinophil count<br>(mean $\pm$ s.d.)         | 0                 | 55.68 $\pm$ 23.9 | <0.001  | 46.22 $\pm$ 21.76   | 65.56 $\pm$ 19.43       | 0.064   |
| Maximum eosinophil count PostPPI<br>(mean $\pm$ s.d.) | -                 | -                | -       | 1.44 $\pm$ 2        | 65 $\pm$ 20.91          | <0.001  |
| <i>Histological findings</i>                          |                   |                  |         |                     |                         |         |
| EoEHSS Grade (0-1)<br>(mean $\pm$ s.d.)               | 0                 | 0.50 $\pm$ 0.19  | <0.001  | 0.43 $\pm$ 0.22     | 0.57 $\pm$ 0.15         | 0.122   |
| EoEHSS Grade (0-1) PostPPI<br>(mean $\pm$ s.d.)       | -                 | -                | -       | 0.06 $\pm$ 0.04     | 0.40 $\pm$ 0.22         | 0.006   |
| EoEHSS Stage (0-1)<br>(mean $\pm$ s.d.)               | 0                 | 0.47 $\pm$ 0.16  | <0.001  | 0.43 $\pm$ 0.17     | 0.57 $\pm$ 0.15         | 0.122   |
| EoEHSS Stage (0-1) PostPPI<br>(mean $\pm$ s.d.)       | -                 | -                | -       | 0.02 $\pm$ 0.03     | 0.31 $\pm$ 0.19         | 0.007   |
| <i>PPI Treatment</i>                                  |                   |                  |         |                     |                         |         |
| Omeoprazol                                            | -                 | -                | -       | 6 (66%)             | 2 (22%)                 | 0.1385  |
| Esomeprazol                                           | -                 | -                | -       | 2 (22%)             | 2 (22%)                 |         |
| Pantoprazol                                           | -                 | -                | -       | 1 (11%)             | 5 (55%)                 |         |

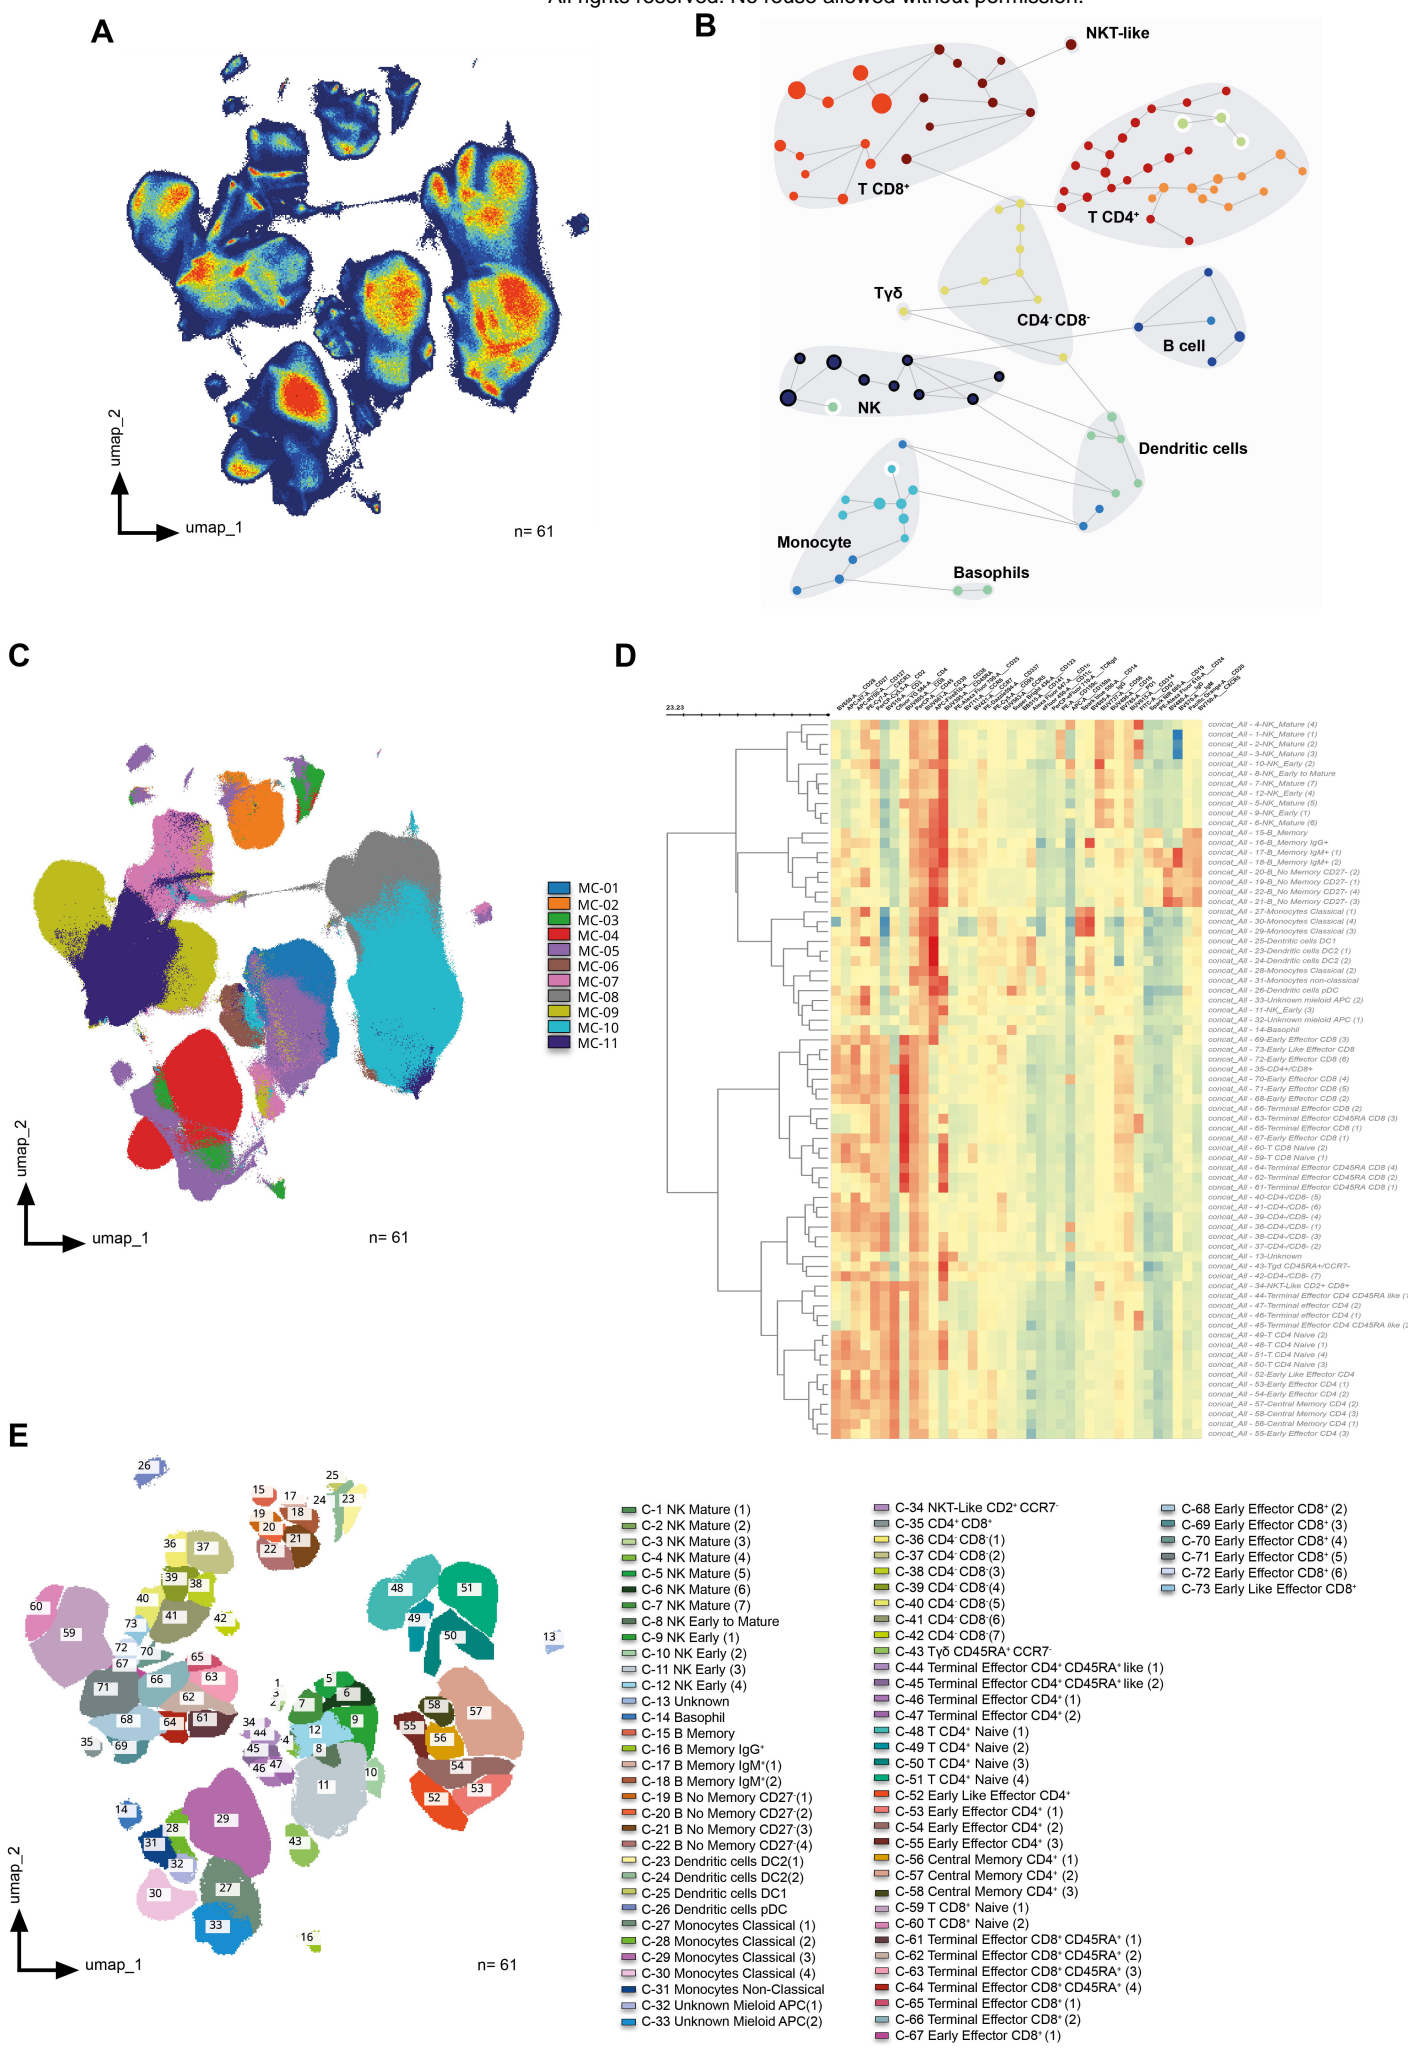

**A**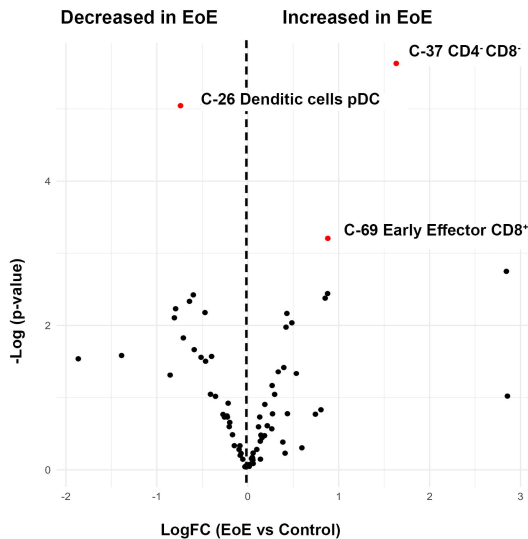**B**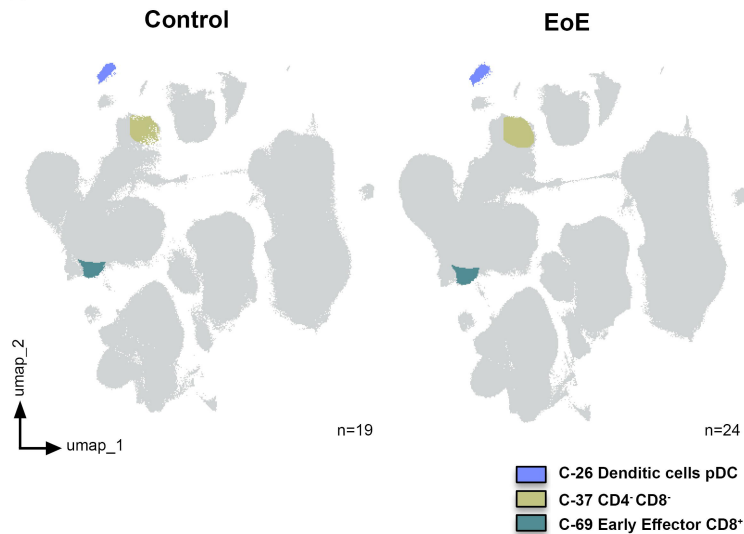**C**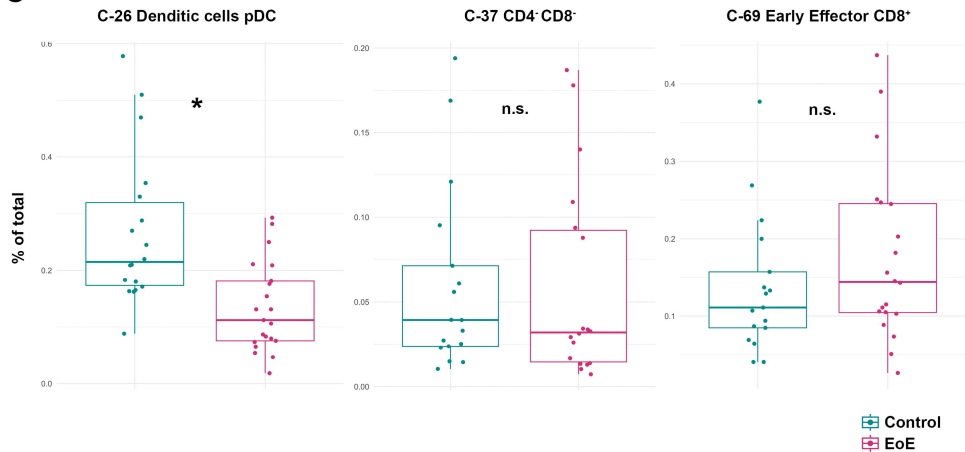

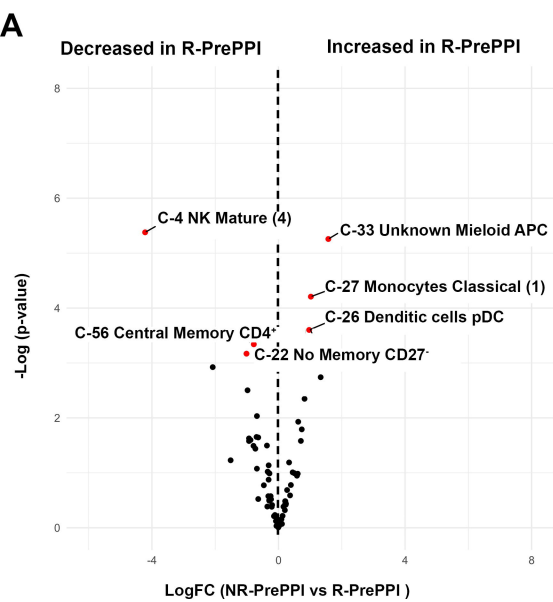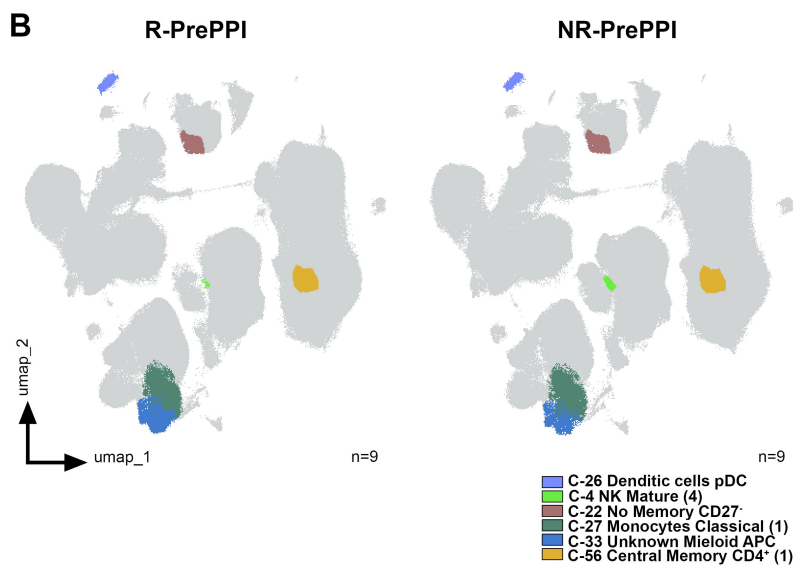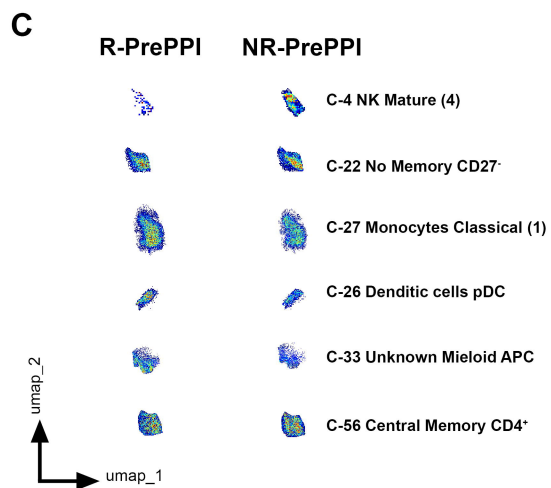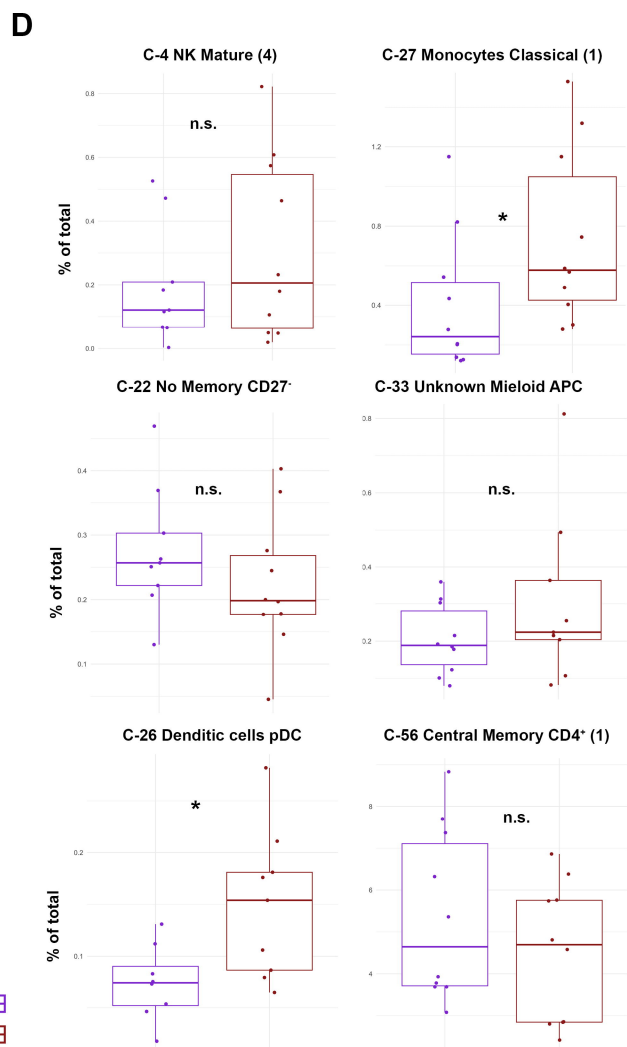

**A**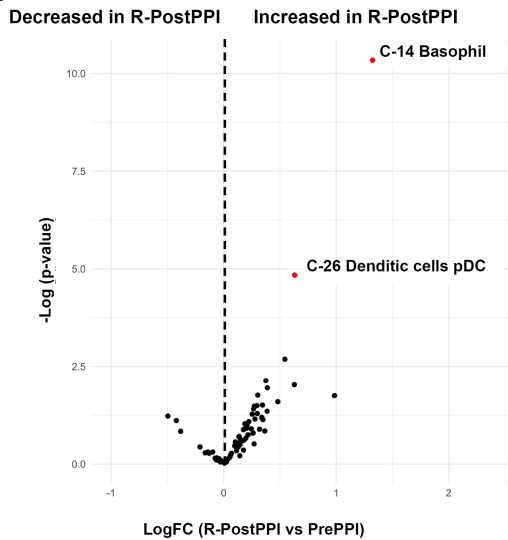**B**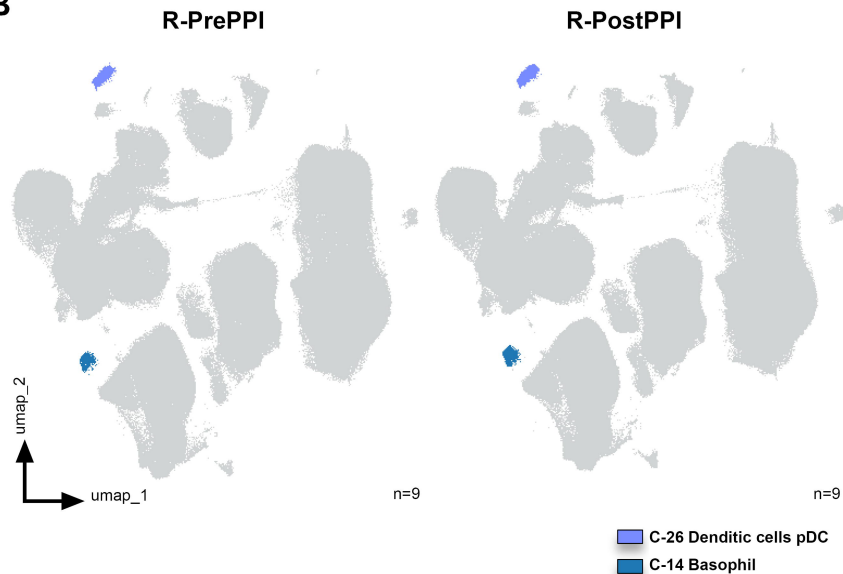**C**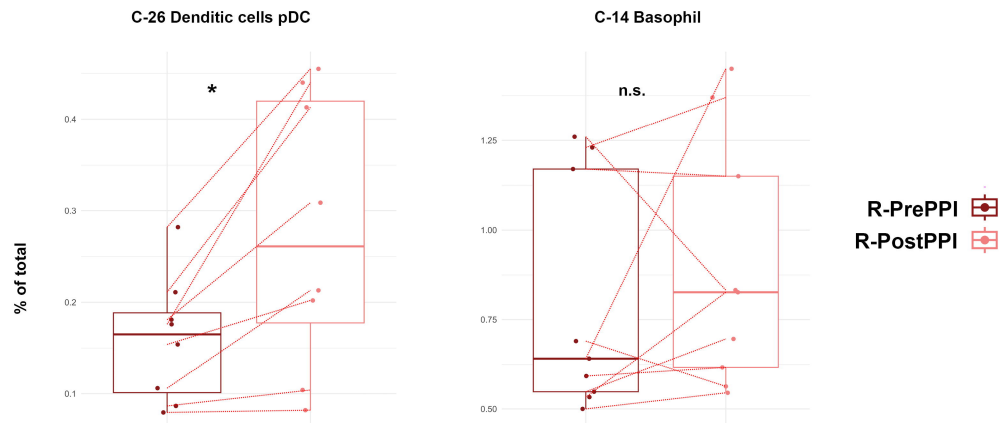

Source: https://medrxiv.org/content/10.1101/2023.12.29.23300619v1.full.pdf
